1 **Csf1rb mutation uncouples two waves of microglia development in zebrafish**

2

3 Giuliano Ferrero<sup>1, 2</sup>¶, Magali Misericchi<sup>1, 2</sup>¶, Elodie Di Ruggiero<sup>1</sup> and Valérie  
4 Wittamer<sup>1, 2, 3</sup>\*

5

6 <sup>1</sup> Institut de Recherche Interdisciplinaire en Biologie Humaine et Moléculaire  
7 (IRIBHM), <sup>2</sup> ULB Institute of Neuroscience (UNI), <sup>3</sup> WELBIO, Université Libre de  
8 Bruxelles (ULB), Brussels, Belgium,

9

10 ¶ These authors contributed equally to this work

11 \* Author for correspondence: Valerie Wittamer ([valerie.wittamer@ulb.be](mailto:valerie.wittamer@ulb.be))

12

13 Abstract word count: 178 words

14 Total text word count: 6237 words

15

16 **KEY WORDS:** microglia, macrophages, zebrafish, csf1r, development, hematopoiesis

17 **ABSTRACT**

18

19         In vertebrates, the ontogeny of microglia, the resident macrophages of the  
20 central nervous system, initiates early during development from primitive  
21 macrophages. While murine embryonic microglia then persist through life, in zebrafish  
22 these cells are transient, as they are fully replaced by an adult population originating  
23 from larval hematopoietic stem cell (HSC)-derived progenitors. *Colony-stimulating*  
24 *factor receptor 1 (csf1r)* is a fundamental regulator of microglia ontogeny in  
25 vertebrates, including zebrafish which possess two paralogous genes: *csf1ra* and  
26 *csf1rb*. While previous work showed invalidation of both genes completely abrogates  
27 microglia development, the specific contribution of each paralog remains largely  
28 unknown. Here, using a fate-mapping strategy to discriminate between the two  
29 microglial waves, we uncover non-overlapping roles for *csf1ra* and *csf1rb* in  
30 hematopoiesis, and identified *csf1rb* as an essential regulator of adult microglia  
31 development. Notably, we demonstrate that *csf1rb* positively regulates HSC-derived  
32 myelopoiesis, resulting in macrophage deficiency, including microglia, in adult mutant  
33 animals. Overall, this study contributes to new insights into evolutionary aspects of  
34 Csf1r signaling and provides an unprecedented framework for the functional  
35 dissection of embryonic versus adult microglia *in vivo*.

## 36 INTRODUCTION

37 Microglia are tissue-resident macrophages that play key immune and  
38 housekeeping roles in the central nervous system (CNS) (Prinz et al., 2019; Sierra et  
39 al., 2019). During development, microglia supports neurogenesis by releasing trophic  
40 factors (Tong and Vidyadaran, 2016), efficiently engulfing apoptotic neurons (Peri and  
41 Nusslein-Volhard, 2008) and pruning supernumerary synapses (Paolicelli et al., 2011).  
42 In the adult brain, microglia actively protrude branches to monitor the CNS  
43 microenvironment and interact with other cell types in order to maintain homeostasis  
44 (Davalos et al., 2005; Nimmerjahn et al., 2005) . The indispensable role of microglia  
45 to foster CNS homeostasis becomes evident in human genetic conditions causing  
46 microglia deficits or dysfunctions (Li and Barres, 2018), which can result in severe  
47 pathologies such as Nasu-Hakola disease (Paloneva et al., 2002) and adult onset  
48 leukoencephalopathy with spheroids (Rademakers et al., 2011). Moreover, microglia  
49 are regarded as key mediators of the severe and prolonged inflammatory response  
50 triggered by CNS damage, which represents a major therapeutic hurdle in  
51 neurodegenerative disorders (Colonna and Butovsky, 2017).

52 During embryogenesis, microglia arise from yolk sac-derived primitive macrophages,  
53 which seed the developing neuroepithelium before the onset of neurogenesis (Alliot et  
54 al., 1999; Boche et al., 2012; Cuadros et al., 1993; Herbomel et al., 1999). Lineage-  
55 tracing studies performed in the mouse model showed these early microglia are  
56 maintained throughout life (Ginhoux et al., 2010), although later hematopoietic waves  
57 might partially contribute to the adult microglia pool (De et al., 2018). Similar to the  
58 mouse, microglia ontogeny in zebrafish initiates from amoeboid-shaped primitive  
59 macrophages, which colonize the neural tissue starting at 35 hours post-fertilization  
60 (hpf) and then differentiate into branched microglia at around 60 hpf (Herbomel et al.,  
61 2001). Unlike their mammalian counterparts however, embryo-derived microglia do  
62 not maintain in zebrafish, and the adult microglial network is established through a  
63 second wave of progenitors that seed the brain parenchyma later during development,  
64 fully replacing the initial population by the end of the juvenile stage (Ferrero et al.,  
65 2018; Xu et al., 2015). Cell transplantation and fate mapping experiments identified  
66 embryonic hematopoietic stem cells (HSCs) arising from the hemogenic endothelium  
67 in the dorsal aorta (DA), as the source of adult microglia in this model (Ferrero et al.,

68 2018). Collectively, these findings have opened new avenues of research regarding  
69 possible functional differences between the two zebrafish microglial waves, as well as  
70 between mouse and zebrafish adult microglia, owing to their distinct cellular origins.  
71 Although zebrafish genetic models deficient for each microglia population would  
72 facilitate such comparative studies, little is known regarding the genetic regulation of  
73 adult microglia ontogeny, and so far no viable mutant resulting in the specific loss of  
74 adult microglia has been reported.

75 The tyrosine kinase *colony-stimulating factor receptor 1 (csf1r)*, also known as  
76 M-csfr, is a fundamental regulator of mononuclear phagocyte homeostasis in  
77 vertebrates (Stanley and Chitu, 2014). It is predominantly expressed in macrophages  
78 and their precursors (regardless of their developmental origin), and exhibits pleiotropic  
79 effects including cell proliferation, differentiation and survival. Accordingly, CSF1R  
80 deficiency in human and mouse leads to a dramatic reduction in tissue macrophage  
81 development, including microglia (Erblich et al., 2011; Oosterhof et al., 2018; Rojo et  
82 al., 2019). Once established, microglia also rely on CSF1R signaling for their  
83 maintenance in the brain parenchyma and can be efficiently depleted in the mouse  
84 brain through pharmacological blockade of CSF1R (Elmore et al., 2014; Squarzoni et  
85 al., 2014). In humans, deficiencies in CSF1R signaling have been associated to  
86 neurodegenerative disorders, further highlighting the central role of CSF1R in  
87 microglia homeostasis (Oosterhof et al., 2019; Rademakers et al., 2011). *In vivo*, two  
88 non-homologous cytokines serve as ligands for CSF1R: Csf-1 and Interleukin 34 (Il-  
89 34) (Lin et al., 2008; Stanley, 1977). Both show distinct spatial and cellular distribution  
90 in the brain parenchyma (Cahoy et al., 2008; Zeisel, 2015) and elicit both overlapping  
91 and non-redundant biological responses in regional microglia (Easley-Neal et al.,  
92 2019; Greter et al., 2012; Kana et al., 2019; Wang et al., 2012).

93 As a result of a teleost-specific whole genome duplication, zebrafish possess  
94 two paralogs of the *csf1r* gene: *csf1ra* and *csf1rb* (Braasch et al., 2006). Fish deficient  
95 in both genes (*csf1r<sup>DM</sup>*) lack microglia from the embryonic to the adult stages  
96 (Oosterhof et al., 2018), thus mimicking the *Csf1r<sup>-/-</sup>* mouse phenotype (Dai, 2002;  
97 Ginhoux et al., 2010). In contrast, individual mutants exhibit a less severe microglial  
98 phenotype, characterized by a transient loss of microglia in *csf1ra<sup>-/-</sup>* zebrafish embryos  
99 and a moderate reduction of adult microglia in both *csf1ra<sup>-/-</sup>* and *csf1rb<sup>-/-</sup>* single mutants  
100 (Oosterhof et al., 2018). Based on these phenotypes, it was suggested that both

101 parologs exhibit redundant functions. This prompted us to revisit the precise  
102 contribution of each paralog to microglia ontogeny, in light of the newly established  
103 model of microglia ontogeny in zebrafish where the two distinct primitive and definitive  
104 microglia populations temporally overlap. We previously demonstrated that the  
105 *kdrl:Cre* model offers a powerful tool to discriminate primitive macrophage-derived  
106 embryonic microglia from HSC-derived adult microglia *in vivo* (Ferrero et al., 2018).  
107 Exploiting this approach, we uncovered non-overlapping functions for *csf1ra* and  
108 *csf1rb* and identified *csf1rb* as a unique regulator of adult microglia development. In  
109 addition, we also demonstrated a specific contribution for the *csf1rb* paralogue to HSC-  
110 derived myelopoiesis, consistent with the specific HSC origin of the adult microglial  
111 population.

112

## 113 RESULTS

### 114 ***Csf1rb* localizes to definitive hematopoiesis and to embryonic microglia during** 115 **embryogenesis.**

116 Previous studies have documented the restricted expression of *csf1ra* in neural  
117 crest-derived cells, early macrophages and microglia during embryonic development  
118 (Caetano-Lopes et al., 2020; Herbomel et al., 2001; Parichy DM, 2000) (Fig. 1A-E),  
119 as well as its role in primitive myelopoiesis (Herbomel et al., 2001). However, although  
120 *csf1rb* has been previously linked to microglia biology (Mazzolini et al., 2019;  
121 Oosterhof et al., 2018), its expression has not been assessed in the context of  
122 developmental hematopoiesis and little is known about its specific functions. Using  
123 whole *in situ* hybridization (WISH), we found that *csf1rb* exhibits an expression profile  
124 distinct from that of *csf1ra* during embryogenesis, with no expression in either neural  
125 crest or primitive macrophages. Rather, *csf1rb* transcripts are first detected at around  
126 30 hpf in the otic vesicle, as well as in a small number of hematopoietic cells in the  
127 posterior blood island (PBI) (Fig. 1F). The latter is consistent with expression in  
128 erythro-myeloid progenitors (EMPs), which are transiently found in the developing  
129 embryo. At 36 hpf, expression of *csf1rb* increases in the otic vesicle, and appears in  
130 cells located along the dorsal aorta (DA), a site at the onset of hematopoietic stem cell  
131 (HSC) formation (Fig. 1G). Over subsequent stages, expression in the otic vesicle  
132 disappears but expands in the DA and at 48 hpf onwards, *csf1rb* expression is

133 observed in the caudal hematopoietic tissue (CHT), region of definitive hematopoiesis  
134 (Fig. 1H). At 72 hpf, the developing thymus also contains *csf1rb*-expressing cells,  
135 reminiscent of HSC-derived lymphoid progenitor immigrants (Fig. 1I, J). Notably,  
136 although *csf1ra* and *csf1rb* show distinct spatial expression patterns during  
137 development, both transcripts overlap in microglia in the brain and retina starting at 72  
138 hpf (Fig. 1E, J).

139 Because expression of *csf1rb* was mainly found in sites of definitive  
140 hematopoiesis, we performed WISH in *runx1* mutant embryos, which lack HSCs.  
141 While expression in the otic vesicle and in the PBI at 30 hpf is normal, we observed a  
142 strong reduction of *csf1rb* transcripts in the DA, CHT and thymus of homozygous  
143 embryos, thus identifying *csf1rb*-expressing cells in these anatomical locations as  
144 HSC-dependent (Fig. 1K-O). As expected, microglial expression of *csf1rb* was not  
145 affected in *runx1<sup>null</sup>* embryos, consistent with their ontogenic relationship with primitive  
146 macrophages, which are *runx1*-independent (Ferrero et al., 2018) (Fig. 1O).  
147 Collectively, these results indicate that *csf1ra* and *csf1rb* paralogs have  
148 nonoverlapping distribution during early development, except for microglia.

149

### 150 ***Csf1rb* expression is restricted to hematopoietic progenitor cells and microglia** 151 **among adult mononuclear phagocytes**

152 We next assessed transcript expression of *csf1r* paralogs in mononuclear  
153 phagocytes isolated from adult tissues. As a source for these studies, we used  
154 Tg(*mhc2dab:GFP*; *cd45:DsRed*) double transgenic fish, as we previously  
155 demonstrated that the *mhc2dab:GFP*; *cd45:DsRed* transgene combination enabled  
156 the isolation by FACS of pure populations of tissue macrophages (Wittamer et al.,  
157 2011), including resident microglia (Ferrero et al., 2018). As shown in Fig. 2A, *csf1ra*  
158 was highly expressed in adult microglia, as well as in mononuclear phagocytes  
159 isolated from whole kidney marrow (WKM), spleen, liver and skin. In contrast to the  
160 ubiquitous expression pattern of *csf1ra*, we found high levels of *csf1rb* transcripts in  
161 microglial cells, very little expression in WKM macrophages and no expression in skin  
162 and spleen macrophages. Analysis of a publicly available WKM single cell dataset  
163 (Lareau et al., 2017) confirmed the lower expression of *csf1rb* versus *csf1ra* in  
164 macrophages, but also revealed major differences, with *csf1rb* being found specifically

165 enriched within hematopoietic progenitor cells (Fig. 2B-E). Together with our WISH  
166 analyses, these results suggest that *csf1rb* expression labels blood progenitors  
167 through life and identified microglia as a unique population of mononuclear  
168 phagocytes to display *csf1rb* expression outside the WKM.

169

## 170 **Different roles of *csf1ra* and *csf1rb* during embryonic microglia development**

171 To study *csf1r* function *in vivo*, we used two zebrafish mutant lines with no  
172 functional *csf1ra* or *csf1rb* paralog. The zebrafish *panther* line carries a point mutation  
173 in *csf1ra*, replacing a valine by a methionine in position 614 (Parichy DM, 2000). This  
174 change induces an impaired functioning of the kinase activity of the receptor, resulting  
175 in the disruption of internal cell signaling. This model has been previously used to  
176 demonstrate the contribution of *csf1ra* to microglia development (Herbomel et al.,  
177 2001; Oosterhof et al., 2018) and constitutes therefore a valuable tool for our  
178 investigations. The zebrafish line *sa1503* harbors a splice site mutation in the *csf1rb*  
179 gene, leading to the inclusion of 86 nucleotides from intron 11 and a premature stop  
180 codon (Fig. S1A). This nonsense mutation results into the synthesis of a truncated  
181 protein that lacks the receptor kinase domain and is expected to be non-functional.  
182 The presence of the non-spliced transcript was confirmed through RT-PCR and  
183 sequencing analyses, thus validating *csf1rb* loss-of-function in the mutant (Fig. S1B,  
184 C). Homozygous *csf1rb*<sup>sa1503</sup> fish exhibit normal external morphology and behavior  
185 and, like the *csf1ra*<sup>-/-</sup> mutant, survive to adulthood.

186 Previous studies indicated that *csf1ra* is not required for early myelopoiesis, as  
187 primitive macrophages develop normally in *csf1ra*<sup>-/-</sup> embryos (Herbomel et al., 2001).  
188 Extending these analyses, we found no effect on the number of *mfap4*<sup>+</sup> primitive  
189 macrophages in *csf1rb* mutants, as determined using whole-mount *in situ*  
190 hybridization (Fig. 3A,B). To study whether both paralogs were simultaneously  
191 required for primitive myelopoiesis, we intercrossed the two single mutant lines and  
192 derived *csf1ra/b* double mutant embryos (hereafter referred to as *csf1r*<sup>DM</sup>). As shown  
193 in Fig. 3A,B, the complete loss of *csf1r* had no consequence on primitive macrophage  
194 ontogeny, as the number of *mfap4*<sup>+</sup> cells in double mutants were similar to that of *wild-*  
195 *type* and single homozygous mutant embryos. This is consistent with our recent  
196 findings using the macrophage *mpeg1:EGFP* reporter line (Kuil et al., 2020). We next

197 investigated the requirement of the different *csf1r* paralogs for the establishment of  
198 embryonic microglia, which differentiate in the brain parenchyma from primitive  
199 macrophages starting at 60 hpf (Ferrero et al., 2018; Herbomel et al., 2001). As  
200 readout for microglia differentiation, we analyzed by WISH the expression of *apoeb*, a  
201 microglia signature gene. Quantification of *apoeb*<sup>+</sup> cells present in the optic tectum at  
202 72 hpf showed the number of microglia was dramatically decreased in *csf1ra*-deficient  
203 embryos ( $0.8 \pm 0.4$  cells) when compared to *wild-type* ( $20.8 \pm 1.4$  cells), unaffected in  
204 *csf1rb*-depleted embryos ( $19.1 \pm 1.3$  cells) and similarly strongly reduced in *csf1r*<sup>DM</sup>  
205 embryos ( $0.8 \pm 0.5$  cells) (Fig. 3C,D). These results indicate that independently, *csf1ra*  
206 and not *csf1rb*, is important for establishing the first wave of microglia during zebrafish  
207 embryogenesis.

208 Because it was previously reported that *csf1ra*<sup>-/-</sup> embryos exhibit a partial  
209 recovery of microglia cells at 6 dpf (Herbomel et al., 2001), we next examined the  
210 status of microglia in the mutants later during development using WISH. While the  
211 numbers of *apoeb*<sup>+</sup> cells were stable from 3 to 6 dpf in *wild-type* and *csf1rb*<sup>-/-</sup> embryos  
212 (approximately 20 cells per optic tectum), we observed a gradual increase in the  
213 number of microglia (from  $0.7 \pm 0.4$  cells at 3 dpf to  $9.7 \pm 1.1$  cells at 6 dpf) in embryos  
214 carrying the *csf1ra*<sup>-/-</sup> mutation (Fig. 3E,F). At 6 dpf microglia cell numbers in *csf1ra*<sup>-/-</sup>  
215 embryos accounted for approximately 50% of total microglia cells found in sibling  
216 controls. Interestingly, at the same developmental stage, repopulation of the brain  
217 parenchyma by microglia was not observed in double mutant embryos, which  
218 remained devoid of *apoeb*-expressing cells. This observation indicated that recovery  
219 of microglia in *csf1ra*-deficient embryos is mediated by *csf1rb*, which suggested there  
220 may be a compensatory role for *csf1rb* in microglia development in the absence of  
221 *csf1ra*. However, when we FACS-sorted *mpeg1:EGFP*<sup>+</sup> cells from the heads of 6 dpf  
222 *wild-type* and *csf1ra*<sup>-/-</sup> embryos, we found no significant difference in expression of  
223 *csf1rb* transcripts between both genotypes (Fig. S2). Taken together, these data  
224 suggest that the partial recovery of embryonic microglia in *csf1ra*<sup>-/-</sup> embryos is *csf1rb*-  
225 dependent but does not require a compensatory increase in *csf1rb* mRNA.

226 We investigated the source of the repopulating microglial cells in *csf1ra*-  
227 deficient embryos. Indeed, microglia recovery in these embryos could result either  
228 from a delay of differentiation of primitive macrophages or from the early and atypical



229 contribution of HSCs, the precursors of adult microglia. We discriminated between  
230 these two possibilities by crossing the *csf1ra* mutant line to *Tg(kdr1:Cre; bactin2:loxP-*  
231 *Stop-loxP-DsRed*<sup>express</sup> (also known as  $\beta$ actin:Switch-DsRed); *mpeg1:EGFP*) triple  
232 transgenics (Fig. 3G). As we previously showed, primitive macrophage-derived  
233 embryonic microglia are GFP<sup>+</sup>, DsRed<sup>-</sup> in this setup (Fig. 3H), while mononuclear  
234 phagocytes originating from EMPs or HSCs are GFP<sup>+</sup>, DsRed<sup>+</sup>, owing to the  
235 hemogenic nature of their precursors (Ferrero et al., 2018). Confocal microscopy  
236 analysis of live embryos revealed that GFP<sup>+</sup> microglia present at 6 dpf in *csf1ra-*  
237 *deficient* embryos did not express the DsRed transgene, thus demonstrating their  
238 lineage relationship with primitive macrophages (Fig. 3I). These findings indicate that  
239 recovered microglial cells in the *csf1ra* mutant share the same cellular origin as their  
240 *wild-type* counterparts and point to a delay of primitive macrophage differentiation as  
241 the cause of the observed phenotype.

242

#### 243 ***csf1rb* is a regulator of definitive microglia**

244 Like the single homozygous mutants, *csf1r*<sup>DM</sup> are viable and fertile, allowing for  
245 investigations into the role of Csf1r signaling in the establishment of definitive  
246 microglia. As a way to discriminate between embryonic and adult microglia in our  
247 analyses, we relied again on mutant fish carrying the *kdr1:Cre;  $\beta$ actin:Switch-DsRed;*  
248 *mpeg1:EGFP* triple transgene (Fig. 4A) and performed confocal analyses of brain  
249 sections immuno-stained for GFP and DsRed. In line with previous findings, the  
250 density of GFP<sup>+</sup> microglia cells in the brain parenchyma was decreased ~60% in single  
251 *csf1ra*<sup>-/-</sup> and *csf1rb*<sup>-/-</sup> mutant fish as compared to their *wild-type* siblings (Fig. C,D,N)  
252 and showed a dramatic reduction (90%) in adult animals lacking both paralogs (Fig.  
253 4E,N). However, analyzes for DsRed transgene expression to assess their primitive  
254 or definitive identity revealed striking microglial phenotypes (Fig. 4F-O). In *wild-type*  
255 fish, all *mpeg1*<sup>+</sup> microglia were DsRed<sup>+</sup>, as expected from their known HSC origin (Fig.  
256 4 F,J,O). Similarly, GFP<sup>+</sup> microglial cells from *csf1ra*<sup>-/-</sup> fish also co-expressed DsRed,  
257 indicating that adult microglia ontogeny still occurs in the absence of *csf1ra* (Fig. 4  
258 G,K,O). In contrast, the majority of the remaining GFP<sup>+</sup> cells in *csf1rb*<sup>-/-</sup> animals were  
259 found to be DsRed<sup>-</sup>, thus excluding them as microglia derived from the adult wave  
260 (Fig.4 H,L,O). Based on the lack of DsRed expression, these *mpeg1:EGFP*<sup>+</sup> cells likely

261 represent residual primitive microglia. This is further supported by observations that in  
262 *csf1r<sup>DM</sup>* animals, which lack primitive microglia, the very few cells present in the brain  
263 parenchyma all expressed DsRed (Figure 4 I,M,O). Collectively, these data indicate  
264 that *csf1rb*, and not *csf1ra*, is essential for establishing the definitive wave of microglia  
265 in zebrafish.

266 To characterize the developmental dynamics leading to the observed  
267 phenotype, we examined the brains of Tg(*kdr*:Cre;  $\beta$ actin:Switch-DsRed;  
268 *mpeg1:EGFP*) *wild-type* and *csf1ra* or *csf1rb* mutants larvae at 21, 28, 35 and 50 dpf.  
269 As we previously reported, this time window encompasses the progressive  
270 replacement of GFP<sup>+</sup> DsRed<sup>-</sup> primitive microglia by definitive GFP<sup>+</sup> DsRed<sup>+</sup> microglia  
271 in the brain parenchyma (Ferrero et al., 2018). These kinetic analyses revealed distinct  
272 phenotypes among the mutants. Consistent with our previous observations, in *wild-*  
273 *type* fish the percentage of adult DsRed<sup>+</sup> microglia steadily increased over time (Fig.  
274 4P). In contrast, the brain of *csf1rb* mutants remained largely devoid of DsRed<sup>+</sup> cells  
275 at all time points, suggesting that microglial progenitors fail to colonize the CNS in the  
276 absence of *csf1rb* (Fig. 4P). Surprisingly, in *csf1ra<sup>null</sup>* animals we observed a shift in  
277 the emergence of adult microglia. At 21 dpf, when GFP<sup>+</sup> DsRed<sup>-</sup> primitive microglia  
278 are still predominant in *wild-type* brains, the majority of microglia in *csf1ra<sup>-/-</sup>* fish already  
279 express DsRed (Fig. 4P). Based on these observations, we hypothesized that  
280 primitive microglia detected in the *csf1ra<sup>-/-</sup>* brain at 6 dpf fail to maintain through the  
281 juvenile stage. Interestingly, considering the overall density of *mpeg1<sup>+</sup>* microglia  
282 across time, irrespective of the origin, we observed that in *wild-type* individuals the  
283 density of microglia increased from  $1,7 \pm 0.07$  cells/mm<sup>3</sup> to  $2,5 \pm 0.2$  cells/mm<sup>3</sup>  
284 between 21 and 50 dpf, mirroring the progressive expansion of the DsRed<sup>+</sup> cells. In  
285 *csf1rb* mutants, microglia similarly expanded from  $1,2 \pm 0.1$  to  $2,2 \pm 0.3$  cells/mm<sup>3</sup>  
286 between 21 and 35 dpf (Fig. 4Q). Given that these cells are from embryonic origin,  
287 such findings suggest that a partial compensation takes place in the brain of *csf1rb<sup>-/-</sup>*  
288 fish in the absence of DsRed<sup>+</sup> adult microglia. However, the potential of primitive  
289 microglia to compensate for the lack of the adult wave appears to be limited, since cell  
290 density dropped to  $1,8 \pm 0.07$  cells/mm<sup>3</sup> at 50 dpf (Fig. 4Q) and remained lower than  
291 in *wild-type* fish throughout adulthood (Fig. 4N). The curve of microglia density across  
292 time followed a different trend in *csf1ra<sup>-/-</sup>* fish, where DsRed<sup>+</sup> cells successfully  
293 established in the brain by 21 dpf, but did not undergo the steady expansion that we

294 observed in *wild-type*. This result suggests that, while dispensable for their ontogeny,  
295 *csf1ra* is likely required for maintaining adult microglia after they colonize the juvenile  
296 brain. Overall, we concluded that the *csf1ra* and *csf1rb* paralogs are respectively  
297 required for the maintenance and specification of embryonic and adult microglia in  
298 zebrafish and that individual loss of function of either paralogue results in reduced  
299 microglia densities in the adult.

300

### 301 ***csf1rb* is required for the development of HSCs-derived myeloid cells**

302 We sought to dissect the mechanisms linking *csf1rb* to adult microglia  
303 development. Based on the expression profile of *csf1rb* in hematopoietic progenitors  
304 and the developmental relationship between adult microglia and HSCs, we  
305 hypothesized that *csf1rb* regulates definitive hematopoiesis in zebrafish. By WISH, we  
306 did not detect any significant alteration in the expression of *runx1* in the DA of *csf1rb*-  
307 deficient embryos, indicating normal specification of the hemogenic endothelium (Fig.  
308 5A,B). In addition, at 3 and 6 dpf, *c-myb* expression in the CHT and the pronephros,  
309 which specifically labels HSCs and progenitors, was not changed in *csf1rb*<sup>-/-</sup> embryos  
310 (Fig. 5C-F). This demonstrates that neither the emergence of HSCs nor the  
311 maintenance of progenitors during embryonic development requires *csf1rb*.

312 We evaluated a possible requirement for *csf1rb* during HSC differentiation. In  
313 the zebrafish embryo, T lymphopoiesis starts at around 50 hpf, with HSC-derived  
314 thymocyte precursors migrating to the developing thymus (Hess and Boehm, 2012;  
315 Murayama et al., 2006). We found that T cell development was not affected in the  
316 absence of *csf1rb*, as expression of the early T cell marker *rag1* was detected in  
317 mutant embryos at levels similar to that seen in *wild-type* (Fig. 5G, H). Next, we  
318 assessed the myeloid potential of *csf1rb*-deficient HSCs. As the different waves of  
319 myelopoiesis temporally overlap during embryonic development, we used triple  
320 transgenic *kdr1:Cre*;  $\beta$ actin:Switch-DsRed; *mpeg1:EGFP* embryos to discriminate in  
321 the CHT between newly born definitive macrophages (GFP<sup>+</sup> DsRed<sup>+</sup>) and primitive  
322 macrophages (GFP<sup>+</sup> DsRed<sup>-</sup>) having colonized the site from the periphery (Fig. 5I). In  
323 *wild-type* embryos, we found that for the first 48 hours of development, all GFP<sup>+</sup>  
324 macrophages present in the CHT (40 cells on average) are derived from primitive  
325 hematopoiesis, as indicated by their lack of DsRed expression (Fig. 5J, K). The first

326 definitive macrophages, identified as DsRed<sup>+</sup> GFP<sup>+</sup> cells, were detected in the CHT at  
327 around 48 hpf (~3 cells on average) (Fig. 5J, K). This population then slowly increased  
328 over time, and at 6 dpf, the CHT contained on average 113 double positive cells per  
329 embryo. By that stage, definitive macrophages in the CHT outnumbered primitive  
330 macrophages, accounting for up to 80% of the total GFP<sup>+</sup> population. Having delineate  
331 the kinetics of differentiation of definitive macrophages in the CHT, we next performed  
332 similar quantification of macrophage numbers in single mutants. In *csf1ra*-deficient  
333 embryos, we found that both the kinetics of appearance and total number of DsRed<sup>+</sup>  
334 GFP<sup>+</sup> double positive cells were similar to *wild-types*, thus indicating that the  
335 developmental program of HSC-derived macrophages was not affected (Fig. 5K-O).  
336 In contrast, *csf1rb*<sup>-/-</sup> embryos exhibited significantly decreased numbers of definitive  
337 macrophages at each time points (4 versus 19 at 72 hpf and 19 versus 113 at 6 dpf)  
338 (Fig. 5K-O). These findings demonstrate that *Csf1rb* activity specifically supports the  
339 embryonic development of HSC-derived macrophages. Interestingly, analysis of CHT  
340 GFP<sup>+</sup> primitive macrophages during the 48 hpf to 6 dpf time-window also revealed  
341 major phenotypic differences among the mutants. Consistent with previous  
342 observations (Herbomel et al., 2001) and our own results suggesting a role for *csf1ra*  
343 in controlling early macrophage invasion in embryonic tissues, we found that the CHT  
344 of *csf1ra* mutants became colonized by 30% less primitive macrophages (Fig. 5J). By  
345 comparison, the numbers of primitive macrophages present in the CHT of *csf1rb*  
346 mutant embryos were similar to that of *wild-types*. These findings suggest that in  
347 primitive macrophages the *csf1rb* paralogue is dispensable for cell migration.  
348 Collectively, these results demonstrate that *csf1rb*, and not *csf1ra*, is required for  
349 definitive myelopoiesis in the zebrafish embryo.

350 To evaluate whether *Csf1rb* functions are required for life, we examined WKM  
351 cell suspensions from *mpeg1:EGFP* transgenics by flow cytometry. These analyses  
352 revealed the relative percentage of *mpeg1:EGFP*<sup>high</sup> cells, which identify macrophages  
353 in adult fish (Ferrero et al., 2020), was reduced from 1 ± 0.2% for *wild-type* to 0.4 ±  
354 0.2% for *csf1rb*<sup>-/-</sup> animals, while *csf1ra*<sup>-/-</sup> fish exhibited an intermediate value (0.7 ±  
355 0.1%) (Fig. 6A). Intriguingly, the *mpeg1:EGFP*<sup>low</sup> population, which labels most IgM<sup>+</sup>  
356 B lymphocytes (Ferrero et al., 2020) was also barely detectable in *csf1rb*<sup>-/-</sup> animals  
357 (Fig. 6B) (Mean ± SEM; *wild-type*: 13 ± 3.6%; *csf1ra*<sup>-/-</sup>: 10.9 ± 0.3%; *csf1rb*<sup>-/-</sup>: 1.6 ±  
358 0.5%). *Csf1rb* mutants also displayed a light-scatter profile distinct from that of *wild-*

359 *type* and *csf1ra*<sup>-/-</sup> fish, with a significant loss of the forward scatter (FSC)<sup>hi</sup> side scatter  
360 (SSC)<sup>hi</sup> myeloid gate (Mean ± SEM, n=3; *wild-type*: 27.5 ± 1.7%; *csf1ra*<sup>-/-</sup>: 26 ± 4.2%;  
361 *csf1rb*<sup>-/-</sup>: 16.3 ± 1.7%), as well as an increase of the FSC<sup>hi</sup> SSC<sup>lo</sup> progenitor fraction  
362 (Mean ± SEM; *wild-type*: 22.2 ± 1.8%; *csf1ra*<sup>-/-</sup>: 28.6 ± 5.8%; *csf1rb*<sup>-/-</sup>: 45.5 ± 1.6%)  
363 (Fig. 6B). As the myeloid fraction mostly contains mature neutrophils, these  
364 observations suggest a complete block at the myeloid progenitor stage. Finally, and  
365 in line with the change in *mpeg1*-expressing B lymphocytes, the relative percentage  
366 of FSC<sup>lo</sup>SSC<sup>lo</sup> lymphoid cells was also impaired in *csf1rb*<sup>-/-</sup> animals (Mean ± SEM;  
367 *wild-type*: 36.2 ± 2.2%; *csf1ra*<sup>-/-</sup>: 34.3 ± 3.6%; *csf1rb*<sup>-/-</sup>: 21.7 ± 0.4%) (Fig. 6A).  
368 Collectively, these findings indicate the absence of *csf1rb* results in functional  
369 deficiencies in myelopoiesis in the adult, and a concomitant lack of *mpeg1*-expressing  
370 B lymphocytes.

371

## 372 DISCUSSION

373 Tissue macrophages constitute a highly heterogeneous compartment, based  
374 on their origin and the niche they inhabit (Bennett and Bennett, 2019; Guillems et al.,  
375 2020). CSF1R signalling is a common pathway regulating the development of most  
376 macrophages in vertebrates, as demonstrated by their dramatic loss (including  
377 microglia) in *Csf1r*-deficient mice and *csf1r*-deficient zebrafish (Dai, 2002; Kuil et al.,  
378 2020; Oosterhof et al., 2018; Rojo et al., 2019). However, while *CSF1R* is represented  
379 only once in mammalian genomes, zebrafish possess two copies of the gene and their  
380 relative contribution to myelopoiesis has remained unknown. Focusing on the specific  
381 context of microglia ontogeny, in this study we have thus investigated the functions of  
382 each paralog during macrophage development. While our gene expression analyses  
383 demonstrate that *csf1rb*, like *csf1ra*, is expressed within the hematopoietic  
384 compartment, they also reveal a divergence in their expression profiles, with *csf1ra*  
385 expressed in all tissue macrophages (regardless of their primitive or definitive origin)  
386 and *csf1rb* restricted to microglia and definitive blood progenitors. Given that in the  
387 mouse *Csf1r* is expressed all throughout the path of macrophage differentiation (from  
388 hematopoietic progenitors to mature cells) (Hawley et al., 2018; Sasmono et al., 2003),  
389 such complementary patterns suggest that subfunctionalization, a process where the  
390 two gene copies partition the ancestral function (Force et al., 1999), may have

391 contributed to the evolution of this family in zebrafish. Accordingly, *csf1ra* signalling is  
392 required for the establishment of primitive macrophage-derived embryonic microglia  
393 (Herbomel et al., 2001; Oosterhof et al., 2018), while *csf1rb* controls the ontogeny of  
394 definitive macrophages, including adult microglia. Our work thus demonstrates that  
395 *csf1ra* and *csf1rb* are jointly required to fulfil the roles of mammalian CSF1R in  
396 myelopoiesis.

397 Interestingly, despite these functional divergences, we also provide evidence  
398 that *csf1rb* is able to compensate, at least partially, for the absence of *csf1ra*. For  
399 example, whereas *csf1rb* loss has no effect on microglia development in embryos with  
400 a functional *csf1ra* paralog, *csf1rb* signalling is responsible for the partial recovery of  
401 microglia observed in *csf1ra*<sup>-/-</sup> larvae, as indicated by the absence of recovery in  
402 *csf1r*<sup>DM</sup> mutants. Since microglia repopulating *csf1ra*<sup>-/-</sup> larvae entirely derived from  
403 primitive macrophages and did not exhibit a compensatory overexpression of *csf1rb*,  
404 it thus appears that in this setting the basal expression level of *csf1rb* on embryonic  
405 microglia is sufficient for driving the recovery process. Our findings also provide new  
406 insights into the functions and complex interplay between *csf1r* paralogs and the three  
407 *Csf1r* ligands identified in zebrafish: Interleukin-34 (Il34), *Csf1a* and *Csf1b*. Similar to  
408 the mouse (Greter et al., 2012; Wang et al., 2012), Interleukin-34 acting through  
409 *Csf1ra* is thought to control the migration of primitive macrophages to the embryonic  
410 neuroepithelium in zebrafish (Kuil et al., 2019; Wu et al., 2018). Accordingly, *il34*-  
411 deficient embryos phenocopy both the microglial loss at 3 dpf and the partial recovery  
412 at 5 dpf observed in *csf1ra* mutants (Herbomel et al., 2001; Kuil et al., 2019). Given  
413 that *csf1r*<sup>DM</sup> larvae are completely devoid of microglia at 6 dpf, this suggests that  
414 *csf1rb*-mediated microglia replenishment in *csf1ra*<sup>-/-</sup> larvae is independent of Il34  
415 signalling. Also, since the very few microglia present at 3 dpf in *csf1ra* or *il34*-deficient  
416 embryos retain their proliferative capacity and can be increased by *csf1a*  
417 overexpression (Kuil et al., 2019; Oosterhof et al., 2018), it is tempting to speculate  
418 that *csf1a* and/or *csf1b* signalling through *csf1rb* triggers the proliferation of embryonic  
419 microglia in *csf1ra* mutants. In line with this interpretation, we recently showed that  
420 primitive macrophages in *csf1r*<sup>DM</sup> embryos, which lose interaction with all *Csf1r*  
421 ligands, exhibit both migration and proliferation defects (Kuil et al., 2020). Further  
422 investigation in zebrafish mutants combining *Csf1* ligands and receptors knockout will  
423 be instrumental in testing this hypothesis.

424 A major finding of our study is the demonstration that the second microglial  
425 wave in zebrafish is completely abolished in absence of *csf1rb*, thus uncovering a  
426 selective role for *csf1rb* in the establishment of HSC-derived adult microglia. Indeed,  
427 although microglia cells are present in each single mutant (albeit at comparably  
428 reduced cell density), lineage tracing of definitive microglia development revealed the  
429 microglial population presents in the brain of *csf1rb*<sup>-/-</sup> adult fish remain of primitive  
430 origin. This is in sharp contrast to *csf1ra*-deficient and *wild-type* fish, where the HSC-  
431 derived adult population fully replaces the primitive microglial pool. Interestingly,  
432 however, although adult microglia develop normally in *csf1ra*-deficient juvenile fish,  
433 their numbers drop towards the adult stage. This suggests that while being  
434 dispensable for the ontogeny of the definitive microglial wave, *csf1ra* likely contributes  
435 to microglia maintenance within the adult brain parenchyma. The opposite microglial  
436 phenotypes observed in *csf1ra* and *csf1rb* mutants also shed light on potential  
437 dynamics between the two microglial waves during development. Through time-  
438 course analyses, we found that the incomplete recovery of primitive microglia in *csf1ra*  
439 juveniles is compensated by an earlier establishment of the definitive wave compared  
440 to *wild-type*. Conversely, the lack of definitive microglia in *csf1rb* mutants results in the  
441 primitive pool being retained in the adult. By analogy with the current view established  
442 in the mouse model (Guilliams et al., 2020), it is conceivable that competition for the  
443 juvenile brain niche regulates the exchange between the two microglial waves, in a  
444 scenario where efficient seeding of the brain by definitive microglia would require the  
445 regression of the primitive wave. Another plausible hypothesis is that the adult wave  
446 may actively participate to the removal of the primitive population, therefore explaining  
447 the maintenance of embryonic microglia in *csf1rb*-deficient adult animals. Future  
448 studies, making use of new and more sophisticated tools, will be required to address  
449 these complex questions. Nevertheless, since neither definitive microglia in *csf1ra*  
450 mutants nor primitive microglia in *csf1rb* mutants achieved the cellular density seen in  
451 *wild-type* adults, other intrinsic or extrinsic factors aside from niche availability are  
452 likely to affect microglia homeostasis in the adult brain.

453 Our investigations into the molecular mechanisms underlying the microglial  
454 phenotype of *csf1rb* mutant fish revealed that HSCs give rise to myeloid cells in a  
455 *csf1rb*-dependent fashion. Indeed, we found that *csf1rb*-deficient fish display a broad  
456 deficit in definitive myelopoiesis, as supported by the decrease of HSC-derived

457 macrophages during embryonic development and in the adult hematopoietic niche.  
458 These findings are consistent with the *runx1*-dependent selective expression of *csf1rb*  
459 on blood progenitor cells throughout life. In addition, *csf1rb* is dispensable for HSC  
460 emergence in the AGM and, unlike *csf1ra*, does not seem to control cell migration to  
461 the different niches. On the whole, this suggests that the depletion of adult microglia  
462 and definitive macrophages in the *csf1rb* mutant results from a deficit of differentiation  
463 at the level of HSC-derived myeloid progenitors. These data add to previous findings  
464 in zebrafish (Yu et al., 2017) and mouse (Azzoni et al., 2018) showing that distinct  
465 molecular mechanisms regulate the emergence of subsequent macrophages waves.  
466 Overall, zebrafish *csf1ra* and *csf1rb* mutants may thus provide insightful models for  
467 the functional dissection of each microglial population and to better understand  
468 microglia development from an evolutionary perspective.

469 Finally, a surprising finding of our study is that fish lacking the *csf1rb* paralog  
470 also lack a population of *mpeg1*<sup>+</sup> B cells in the WKM. As we previously showed that  
471 these cells account for the majority of IgM-expressing B lymphocytes in zebrafish  
472 (Ferrero et al., 2020), these observations suggest that B lymphopoiesis is globally  
473 impaired in *csf1rb* mutant animals. This is interesting because while no such  
474 phenotype has been reported in adult CSF1R-deficient mice so far, expression of  
475 CSF1R was recently identified on a subset of embryonic myeloid-primed B-cell  
476 progenitors in the fetal liver, and its loss associated to defective fetal B-cell  
477 differentiation *in vivo* (Zriwil et al., 2016). Although the precise contribution of *csf1rb* to  
478 zebrafish B lymphopoiesis remains to be investigated, our work thus provides further  
479 support for a role of CSF1R beyond myelopoiesis in vertebrates. Also, because in the  
480 mouse the fetal wave of B lymphopoiesis mainly produces innate-like B-1  
481 lymphocytes, and given the B-cell phenotype similarities between *Csf1r*-deficient mice  
482 and *csf1rb*<sup>-/-</sup> zebrafish, this study also adds to the growing view that mammalian B-1  
483 lymphocytes and teleost adult B cells could be evolutionary related (Scapigliati et al.,  
484 2018).

485

486

487



## 488 MATERIALS AND METHODS

### 489 Zebrafish husbandry

490 Zebrafish were maintained under standard conditions, according to FELASA  
491 guidelines (Alestrom et al., 2019). All experimental procedures were approved by the  
492 ethical committee for animal welfare (CEBEA) from the ULB. The following lines were  
493 used: *Tg(mpeg1:EGFP)<sup>gl22</sup>* (Ellett et al., 2011); *Tg(kdrl:Cre)<sup>s89</sup>* (Bertrand et al., 2010);  
494 *Tg(actb2:loxP-STOP-loxP-DsRed<sup>express</sup>)<sup>sd5</sup>* (Bertrand et al., 2010); *panther<sup>d4e1</sup>* (Parichy  
495 DM, 2000); *csf1rb<sup>sa1503</sup>* mutants were generated via ethyl-nitrosurea (ENU)  
496 mutagenesis by the Sanger Institute Zebrafish Mutation Project. The following primers  
497 were used to identify the point mutation in intron 11 by PCR on genomic DNA:  
498 sa1503F (5'-CTCTCTCTGTGGCAACTCTATGGATG-3'); sa1503R (5'-  
499 CGCTCCTGCTCCAAGAACCTG-3').

500

### 501 Flow cytometry and cell sorting

502 Single-cell suspensions of zebrafish whole embryos or adult WKM were prepared as  
503 previously described (Ferrero et al., 2018). Heads of 6 dpf zebrafish larvae were  
504 rapidly dissected in ice-cold PBS and then processed as the other samples. Flow  
505 cytometry and cell sorting were performed with a FACS ARIA II (Becton Dickinson).  
506 Analyses were performed using the FlowJo software (Treestar).

507

### 508 Quantitative PCR

509 RNA extraction from sorted cells and cDNA synthesis were performed as described  
510 (Ferrero et al., 2020). Biological triplicates were compared for each subset. Relative  
511 amount of each transcript was quantified via the  $\Delta$ Ct method, using *elongation-Factor-*  
512 *1-alpha (ef1a)* expression for normalization. Primers used are reported in Table 1.

513

### 514 Whole Mount In Situ Hybridization (WISH)

515 Probes for *apoeb*, *runx*, *c-myb*, *mfap4* and *csf1rb* were synthesized *in-vitro*. For the  
516 *csf1rb* WISH, we combined two probes hybridizing to different portion of the transcript  
517 to increase the signal strength. The following primers were used for the generation of  
518 the *csf1rb* probes from zebrafish 4 dpf larvae cDNA: Fw1: 5'-  
519 ATCATTGCAGTGCTGACCTGTATG; Rv1: 5'-  
520 GGTGAGCTCCAGGTGAAGTTGTAG; Fw2: 5'-ATGGCCAACCAATCCATTTCTGAG  
521 Rv2: 5'-AGTAAGCATTCTTGC GGGATGTT. Embryos or larvae were fixed in 4%  
522 PFA at 4°C O/N and then stored in methanol at -20°C. Whole-mount *in-situ*  
523 hybridization was performed according to previously published protocols (Thisse and  
524 Thisse, 2008).

525

## 526 **Immunofluorescence, tissue clearing and imaging**

527 Larvae were fixed in 4% PFA O/N at 4°C and stored in methanol at -20°C. Adult  
528 zebrafish brains were fixed 4 hours in 4% PFA at 4°C, incubated in 30% sucrose/PBS  
529 overnight and embedded in OCT (Leica) for cryosectioning. Immunofluorescence on  
530 whole embryos or 30µm-thick brain slices was performed as described (Ferrero et al.,  
531 2018), using chicken anti-GFP (1:500, Abcam), polyclonal rabbit anti-DsRed (1:500,  
532 Takara) primary antibodies and goat-anti chicken Alexa 488 (1:500, Abcam), donkey  
533 anti-rabbit alexa 594 (1:500, Abcam) secondary antibodies. Dissected brains from  
534 larval or juvenile fish (21 to 50 dpf) were fixed in 4% PFA at pH 8.5 to preserve  
535 endogenous fluorescence, and subsequently tissue-cleared using the CUBIC protocol  
536 (Susaki et al., 2015), as described (Ferrero et al., 2018). Imaging was performed on a  
537 Zeiss LSM 780 inverted microscope, using a Plan Apochromat 20x objective for adult  
538 sections and a LD LCI Plan Apochromat 25x water-immersion objective for whole-  
539 mount embryos and tissue-cleared brains. Images of entire adult brain sections were  
540 obtained by combining 15 tiles, for a total area of 1.80 mm<sup>2</sup>.

541

542

543

544 **ACKNOWLEDGEMENTS**

545 We thank Mireia Rovira, member of the Wittamer lab, for critical discussion and  
546 comments on the manuscript. We are also grateful to Marianne Caron for technical  
547 assistance and to Christine Dubois for help with flow cytometry.

548

549 **COMPETING INTERESTS**

550 The authors declare no competing financial interests.

551

552 **FUNDING**

553 This work was funded in part by a WELBIO Grant (WELBIO-CR-2015S-04), the Funds  
554 for Scientific Research (FNRS) under Grant Numbers F451218F, UN06119F and  
555 UG03019F, and the Minerve Foundation (to V.W.). G.F. is supported by a Research  
556 Fellowship (FNRS), M.M. by a fellowship from The Belgian Kid's Fund and E.D. by a  
557 fellowship from the Fund for Research Training in Industry and Agriculture (FRIA).

558

559 **DATA AVAILABILITY**

560 All datasets generated for this study are included in the manuscript/ Supplementary  
561 Files.

562

563 **AUTHORSHIP CONTRIBUTION**

564 V.W. designed the research and directed the study. G.F., M.M and E.D. performed  
565 experiments. G.F. and V.W. wrote the manuscript with comments from all authors.

566

567 **REFERENCES**

- 568 **Alestrom, P., D'Angelo, L., Midtlyng, P. J., Schorderet, D. F., Schulte-Merker, S.,**  
569 **Sohm, F. and Warner, S. (2019).** Zebrafish: Housing and husbandry  
570 recommendations. *Lab Anim*, 23677219869037.
- 571 **Alliot, F., Godin, I. and Pessac, B. (1999).** Microglia derive from progenitors,  
572 originating from the yolk sac, and which proliferate in the brain. *Brain Res Dev Brain*  
573 *Res* **117**, 145-152.
- 574 **Azzoni, E., Frontera, V., McGrath, K. E., Harman, J., Carrelha, J., Nerlov, C., Palis,**  
575 **J., Jacobsen, S. E. W. and de Bruijn, M. F. (2018).** Kit ligand has a critical role in  
576 mouse yolk sac and aorta-gonad-mesonephros hematopoiesis. *EMBO Rep*.
- 577 **Bennett, M. L. and Bennett, F. C. (2019).** The influence of environment and origin on  
578 brain resident macrophages and implications for therapy. *Nature Neuroscience*.
- 579 **Bertrand, J. Y., Chi, N. C., Santoso, B., Teng, S., Stainier, D. Y. and Traver, D.**  
580 (2010). Haematopoietic stem cells derive directly from aortic endothelium during  
581 development. *Nature* **464**, 108-111.
- 582 **Boche, D., Perry, V. H. and Nicoll, J. A. (2012).** Review: activation patterns of  
583 microglia and their identification in the human brain. *Neuropathol Appl Neurobiol* **39**,  
584 3-18.
- 585 **Braasch, I., Salzburger, W. and Meyer, A. (2006).** Asymmetric evolution in two fish-  
586 specifically duplicated receptor tyrosine kinase paralogs involved in teleost  
587 coloration. *Mol Biol Evol* **23**, 1192-1202.
- 588 **Caetano-Lopes, J., Henke, K., Urso, K., Duryea, J., Charles, J. F., Warman, M. L.**  
589 **and Harris, M. P. (2020).** Unique and non-redundant function of csf1r paralogues in  
590 regulation and evolution of post-embryonic development of the zebrafish.  
591 *Development* **147**.
- 592 **Cahoy, J. D., Emery, B., Kaushal, A., Foo, L. C., Zamanian, J. L., Christopherson,**  
593 **K. S., Xing, Y., Lubischer, J. L., Krieg, P. A., Krupenko, S. A., et al. (2008).** A  
594 transcriptome database for astrocytes, neurons, and oligodendrocytes: a new  
595 resource for understanding brain development and function. *J Neurosci* **28**, 264-278.
- 596 **Colonna, M. and Butovsky, O. (2017).** Microglia Function in the Central Nervous  
597 System During Health and Neurodegeneration. *Annu Rev Immunol* **35**, 441-468.

- 598 **Cuadros, M. A., Martin, C., Coltey, P., Almendros, A. and Navascues, J.** (1993).  
599 First appearance, distribution, and origin of macrophages in the early development of  
600 the avian central nervous system. *J Comp Neurol* **330**, 113-129.
- 601 **Dai, X. M. R., G.R.; Hapel, A.J.; Dominguez, M.G.; Russell, R.G.; Kapp, S.;**  
602 **Sylvestre, V.; Stanley, E.R.** (2002). Targeted disruption of the mouse colony-  
603 stimulating factor 1 receptor gene results in osteopetrosis, mononuclear phagocyte  
604 deficiency, increased primitive progenitor cell frequencies, and reproductive defects.  
605 *Blood* **99**, 10.
- 606 **Davalos, D., Grutzendler, J., Yang, G., Kim, J. V., Zuo, Y., Jung, S., Littman, D.**  
607 **R., Dustin, M. L. and Gan, W. B.** (2005). ATP mediates rapid microglial response to  
608 local brain injury in vivo. *Nat Neurosci* **8**, 752-758.
- 609 **De, S., Van Deren, D., Peden, E., Hockin, M., Boulet, A., Titen, S. and Capecchi,**  
610 **M. R.** (2018). Two distinct ontogenies confer heterogeneity to mouse brain microglia.  
611 *Development* **145**.
- 612 **Easley-Neal, C., Foreman, O., Sharma, N., Zarrin, A. A. and Weimer, R. M.** (2019).  
613 CSF1R Ligands IL-34 and CSF1 Are Differentially Required for Microglia Development  
614 and Maintenance in White and Gray Matter Brain Regions. *Front Immunol* **10**, 2199.
- 615 **Ellett, F., Pase, L., Hayman, J. W., Andrianopoulos, A. and Lieschke, G. J.** (2011).  
616 mpeg1 promoter transgenes direct macrophage-lineage expression in zebrafish.  
617 *Blood* **117**, e49-56.
- 618 **Elmore, M. R., Najafi, A. R., Koike, M. A., Dagher, N. N., Spangenberg, E. E., Rice,**  
619 **R. A., Kitazawa, M., Matusow, B., Nguyen, H., West, B. L., et al.** (2014). Colony-  
620 stimulating factor 1 receptor signaling is necessary for microglia viability, unmasking  
621 a microglia progenitor cell in the adult brain. *Neuron* **82**, 380-397.
- 622 **Erblich, B., Zhu, L., Etgen, A. M., Dobrenis, K. and Pollard, J. W.** (2011). Absence  
623 of colony stimulation factor-1 receptor results in loss of microglia, disrupted brain  
624 development and olfactory deficits. *PLoS One* **6**, e26317.
- 625 **Ferrero, G., Gomez, E., Lyer, S., Rovira, M., Miserocchi, M., Langenau, D. M.,**  
626 **Bertrand, J. Y. and Wittamer, V.** (2020). The macrophage-expressed gene (mpeg)  
627 1 identifies a subpopulation of B cells in the adult zebrafish. *J Leukoc Biol* **107**, 431-  
628 443.
- 629 **Ferrero, G., Mahony, C. B., Dupuis, E., Yvernogeu, L., Di Ruggiero, E.,**  
630 **Miserocchi, M., Caron, M., Robin, C., Traver, D., Bertrand, J. Y., et al.** (2018).

- 631 Embryonic Microglia Derive from Primitive Macrophages and Are Replaced by cmyb-  
632 Dependent Definitive Microglia in Zebrafish. *Cell Rep* **24**, 130-141.
- 633 **Force, A., Lynch, M., Pickett, B. F., Amores, A., Yan, Y. and Postlethwait, J.**  
634 (1999). Preservation of Duplicate Genes by Complementary, Degenerative Mutations.  
635 *Genetics* **151**, 15.
- 636 **Ginhoux, F., Greter, M., Leboeuf, M., Nandi, S., See, P., Gokhan, S., Mehler, M.**  
637 **F., Conway, S. J., Ng, L. G., Stanley, E. R., et al.** (2010). Fate mapping analysis  
638 reveals that adult microglia derive from primitive macrophages. *Science* **330**, 841-845.
- 639 **Greter, M., Lelios, I., Pelczar, P., Hoeffel, G., Price, J., Leboeuf, M., Kundig, T. M.,**  
640 **Frei, K., Ginhoux, F., Merad, M., et al.** (2012). Stroma-derived interleukin-34 controls  
641 the development and maintenance of langerhans cells and the maintenance of  
642 microglia. *Immunity* **37**, 1050-1060.
- 643 **Guilliams, M., Thierry, G. R., Bonnardel, J. and Bajenoff, M.** (2020). Establishment  
644 and Maintenance of the Macrophage Niche. *Immunity* **52**, 434-451.
- 645 **Hawley, C. A., Rojo, R., Raper, A., Sauter, K. A., Lisowski, Z. M., Grabert, K., Bain,**  
646 **C. C., Davis, G. M., Louwe, P. A., Ostrowski, M. C., et al.** (2018). Csf1r-mApple  
647 Transgene Expression and Ligand Binding In Vivo Reveal Dynamics of CSF1R  
648 Expression within the Mononuclear Phagocyte System. *J Immunol* **200**, 2209-2223.
- 649 **Herbomel, P., Thisse, B. and Thisse, C.** (1999). Ontogeny and behaviour of early  
650 macrophages in the zebrafish embryo. *Development* **126**, 3735-3745.
- 651 --- (2001). Zebrafish early macrophages colonize cephalic mesenchyme and  
652 developing brain, retina, and epidermis through a M-CSF receptor-dependent invasive  
653 process. *Dev Biol* **238**, 274-288.
- 654 **Hess, I. and Boehm, T.** (2012). Intravital imaging of thymopoiesis reveals dynamic  
655 lympho-epithelial interactions. *Immunity* **36**, 298-309.
- 656 **Kana, V., Desland, F. A., Casanova-Acebes, M., Ayata, P., Badimon, A., Nabel,**  
657 **E., Yamamuro, K., Sneuboer, M., Tan, I. L., Flanigan, M. E., et al.** (2019). CSF-1  
658 controls cerebellar microglia and is required for motor function and social interaction.  
659 *J Exp Med*.
- 660 **Kuil, L. E., Oosterhof, N., Ferrero, G., Mikulasova, T., Hason, M., Dekker, J.,**  
661 **Rovira, M., van der Linde, H. C., van Strien, P. M., de Pater, E., et al.** (2020).

- 662 Zebrafish macrophage developmental arrest underlies depletion of microglia and  
663 reveals Csf1r-independent metaphocytes. *Elife* **9**.
- 664 **Kuil, L. E., Oosterhof, N., Geurts, S. N., van der Linde, H. C., Meijering, E. and**  
665 **van Ham, T. J.** (2019). Reverse genetic screen reveals that Il34 facilitates yolk sac  
666 macrophage distribution and seeding of the brain. *Dis Model Mech* **12**.
- 667 **Lareau, C., Iyer, S., Langenau, D. M. and Aryee, M.** (2017). Single Cell inDrops  
668 RNA-Seq Visualization of Adult Zebrafish Whole Kidney Marrow. Harvard University.  
669 Available at <https://molpath.shinyapps.io/zebrafishblood/>.
- 670 **Li, Q. and Barres, B. A.** (2018). Microglia and macrophages in brain homeostasis and  
671 disease. *Nat Rev Immunol* **18**, 225-242.
- 672 **Lin, H., Lee, E., Hestir, K., Leo, C., Huang, M., Bosch, E., Halenbeck, R., Wu, G.,**  
673 **Zhou, A., Behrens, D., et al.** (2008). Discovery of a cytokine and its receptor by  
674 functional screening of the extracellular proteome. *Science* **320**, 807-811.
- 675 **Mazzolini, J., Le Clerc, S., Morisse, G., Coulonges, C., Kuil, L. E., van Ham, T. J.,**  
676 **Zagury, J. F. and Sieger, D.** (2019). Gene expression profiling reveals a conserved  
677 microglia signature in larval zebrafish. *Glia*.
- 678 **Murayama, E., Kissa, K., Zapata, A., Mordelet, E., Briolat, V., Lin, H. F., Handin,**  
679 **R. I. and Herbomel, P.** (2006). Tracing hematopoietic precursor migration to  
680 successive hematopoietic organs during zebrafish development. *Immunity* **25**, 963-  
681 975.
- 682 **Nimmerjahn, A., Kirchhoff, F. and Helmchen, F.** (2005). Resting microglial cells are  
683 highly dynamic surveillants of brain parenchyma in vivo. *Science* **308**, 1314-1318.
- 684 **Oosterhof, N., Chang, I. J., Karimiani, E. G., Kuil, L. E., Jensen, D. M., Daza, R.,**  
685 **Young, E., Astle, L., van der Linde, H. C., Shivaram, G. M., et al.** (2019).  
686 Homozygous Mutations in CSF1R Cause a Pediatric-Onset Leukoencephalopathy  
687 and Can Result in Congenital Absence of Microglia. *Am J Hum Genet*.
- 688 **Oosterhof, N., Kuil, L. E., van der Linde, H. C., Burm, S. M., Berdowski, W., van**  
689 **Ijcken, W. F. J., van Swieten, J. C., Hol, E. M., Verheijen, M. H. G. and van Ham,**  
690 **T. J.** (2018). Colony-Stimulating Factor 1 Receptor (CSF1R) Regulates Microglia  
691 Density and Distribution, but Not Microglia Differentiation In Vivo. *Cell Rep* **24**, 1203-  
692 1217 e1206.

- 693 **Paloneva, J., Manninen, T., Christman, G., Hovanes, K., Mandelin, J., Adolfsson,**  
694 **R., Bianchin, M., Bird, T., Miranda, R., Salmaggi, A., et al. (2002).** Mutations in two  
695 genes encoding different subunits of a receptor signaling complex result in an identical  
696 disease phenotype. *Am J Hum Genet* **71**, 656-662.
- 697 **Paolicelli, R. C., Bolasco, G., Pagani, F., Maggi, L., Scianni, M., Panzanelli, P.,**  
698 **Giustetto, M., Ferreira, T. A., Guiducci, E., Dumas, L., et al. (2011).** Synaptic  
699 pruning by microglia is necessary for normal brain development. *Science* **333**, 1456-  
700 1458.
- 701 **Parichy DM, R. D., Paw B, Zon LI, Johnson SL (2000).** An orthologue of the kit-  
702 related gene *fms* is required for development of neural crest-derived xanthophores  
703 and a subpopulation of adult melanocytes in the zebrafish, *Danio rerio*. *Development*  
704 **127**, 3031-3044.
- 705 **Peri, F. and Nusslein-Volhard, C. (2008).** Live imaging of neuronal degradation by  
706 microglia reveals a role for v0-ATPase a1 in phagosomal fusion in vivo. *Cell* **133**, 916-  
707 927.
- 708 **Prinz, M., Jung, S. and Priller, J. (2019).** Microglia Biology: One Century of Evolving  
709 Concepts. *Cell* **179**, 292-311.
- 710 **Rademakers, R., Baker, M., Nicholson, A. M., Rutherford, N. J., Finch, N., Soto-**  
711 **Ortolaza, A., Lash, J., Wider, C., Wojtas, A., DeJesus-Hernandez, M., et al. (2011).**  
712 Mutations in the colony stimulating factor 1 receptor (CSF1R) gene cause hereditary  
713 diffuse leukoencephalopathy with spheroids. *Nat Genet* **44**, 200-205.
- 714 **Rojo, R., Raper, A., Ozdemir, D. D., Lefevre, L., Grabert, K., Wollscheid-**  
715 **Lengeling, E., Bradford, B., Caruso, M., Gazova, I., Sanchez, A., et al. (2019).**  
716 Deletion of a *Csf1r* enhancer selectively impacts CSF1R expression and development  
717 of tissue macrophage populations. *Nat Commun* **10**, 3215.
- 718 **Sasmono, R. T., Oceandy, D., Pollard, J. W., Tong, W., Pavli, P., Wainwright, B.**  
719 **J., Ostrowski, M. C., Himes, S. R. and Hume, D. A. (2003).** A macrophage colony-  
720 stimulating factor receptor-green fluorescent protein transgene is expressed  
721 throughout the mononuclear phagocyte system of the mouse. *Blood* **101**, 1155-1163.
- 722 **Scapigliati, G., Fausto, A. M. and Picchiatti, S. (2018).** Fish Lymphocytes: An  
723 Evolutionary Equivalent of Mammalian Innate-Like Lymphocytes? *Front Immunol* **9**,  
724 971.



- 725 **Sierra, A., Paolicelli, R. C. and Kettenmann, H.** (2019). Cien Años de Microglía:  
726 Milestones in a Century of Microglial Research. *Trends in Neurosciences*.
- 727 **Squarzoni, P., Oller, G., Hoeffel, G., Pont-Lezica, L., Rostaing, P., Low, D.,**  
728 **Bessis, A., Ginhoux, F. and Garel, S.** (2014). Microglia modulate wiring of the  
729 embryonic forebrain. *Cell Rep* **8**, 1271-1279.
- 730 **Stanley, E. R. and Chitu, V.** (2014). CSF-1 receptor signaling in myeloid cells. *Cold*  
731 *Spring Harb Perspect Biol* **6**.
- 732 **Stanley, E. R. H., P.M.** (1977). Factors Regulating Macrophage Production and  
733 Growth. Purification and some properties of the colony stimulating factor from medium  
734 conditioned by mouse L cells. *J Biol Chem* **252**, 8.
- 735 **Susaki, E. A., Tainaka, K., Perrin, D., Yukinaga, H., Kuno, A. and Ueda, H. R.**  
736 (2015). Advanced CUBIC protocols for whole-brain and whole-body clearing and  
737 imaging. *Nat Protoc* **10**, 1709-1727.
- 738 **Thisse, C. and Thisse, B.** (2008). High-resolution in situ hybridization to whole-mount  
739 zebrafish embryos. *Nat Protoc* **3**, 59-69.
- 740 **Tong, C. K. and Vidyadaran, S.** (2016). Role of microglia in embryonic neurogenesis.  
741 *Exp Biol Med (Maywood)* **241**, 1669-1675.
- 742 **Wang, Y., Szretter, K. J., Vermi, W., Gilfillan, S., Rossini, C., Cella, M., Barrow, A.**  
743 **D., Diamond, M. S. and Colonna, M.** (2012). IL-34 is a tissue-restricted ligand of  
744 CSF1R required for the development of Langerhans cells and microglia. *Nat Immunol*  
745 **13**, 753-760.
- 746 **Wittamer, V., Bertrand, J. Y., Gutschow, P. W. and Traver, D.** (2011).  
747 Characterization of the mononuclear phagocyte system in zebrafish. *Blood* **117**, 7126-  
748 7135.
- 749 **Wu, S., Xue, R., Hassan, S., Nguyen, T. M. L., Wang, T., Pan, H., Xu, J., Liu, Q.,**  
750 **Zhang, W. and Wen, Z.** (2018). Il34-Csf1r Pathway Regulates the Migration and  
751 Colonization of Microglial Precursors. *Dev Cell* **46**, 552-563 e554.
- 752 **Xu, J., Zhu, L., He, S., Wu, Y., Jin, W., Yu, T., Qu, J. Y. and Wen, Z.** (2015).  
753 Temporal-Spatial Resolution Fate Mapping Reveals Distinct Origins for Embryonic  
754 and Adult Microglia in Zebrafish. *Dev Cell* **34**, 632-641.

755 **Yu, T., Guo, W., Tian, Y., Xu, J., Chen, J., Li, L. and Wen, Z.** (2017). Distinct  
756 regulatory networks control the development of macrophages of different origins in  
757 zebrafish. *Blood* **129**, 509-519.

758 **Zeisel, A. M.-M., A.B.; Codeluppi, S.; Lönnerberg P.; La Manno, G.; Juréus, A.;**  
759 **Marques, S.; Munguba, H.; He, L.; Betsholtz, C.; Rolny, C.; Castelo-Branco, G.;**  
760 **Hjerling-Leffler, J.; Linnarsson, S.** (2015). Cell types in the mouse cortex and  
761 hippocampus revealed by single-cell RNA-seq. *Science* **347**, 5.

762 **Zriwil, A., Boiers, C., Wittmann, L., Green, J. C., Woll, P. S., Jacobsen, S. E. and**  
763 **Sitnicka, E.** (2016). Macrophage colony-stimulating factor receptor marks and  
764 regulates a fetal myeloid-primed B-cell progenitor in mice. *Blood* **128**, 217-226.

765

Figure 1

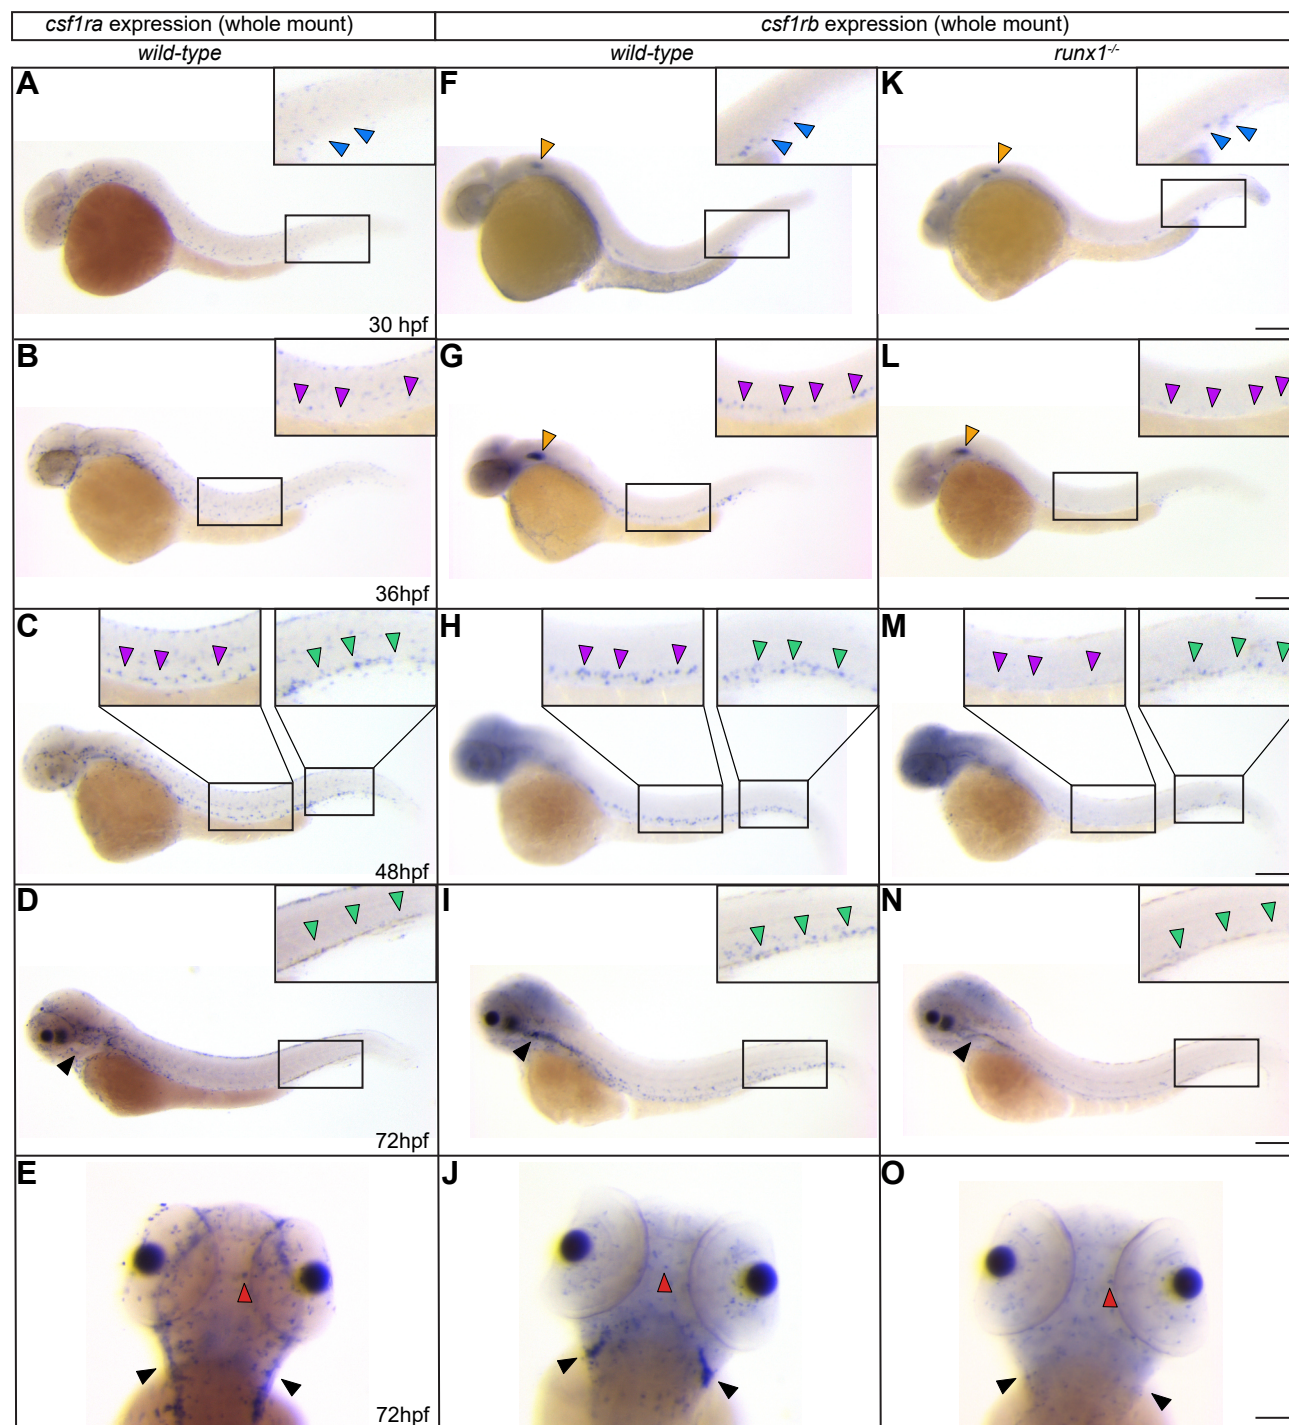

**Figure 1. *Csf1ra* and *csf1rb* paralogs have nonoverlapping distribution during early development, except for microglia.** Whole-mount in-situ hybridization (WISH) expression profiles of *csf1ra* (A-E) and *csf1rb* (F-J) in *wild-type* and *csf1rb* in *runx1<sup>-/-</sup>* (K-O) embryos, at the indicated stages. All lateral views, except for E, J and O, shown in dorsal view. Orange and blue arrowheads indicate expression in the otic vesicle and posterior blood island (PBI) region, respectively. Purple and green arrowheads indicate expression in the dorsal aorta (DA) and caudal hematopoietic tissue (CHT), respectively. Black arrowheads show bilateral thymi and red arrowheads are microglial cells. Scale bars: 200  $\mu$ m (30 and 36 hpf); 180  $\mu$ m (48 hpf); 150  $\mu$ m (72 hpf).

Figure 2

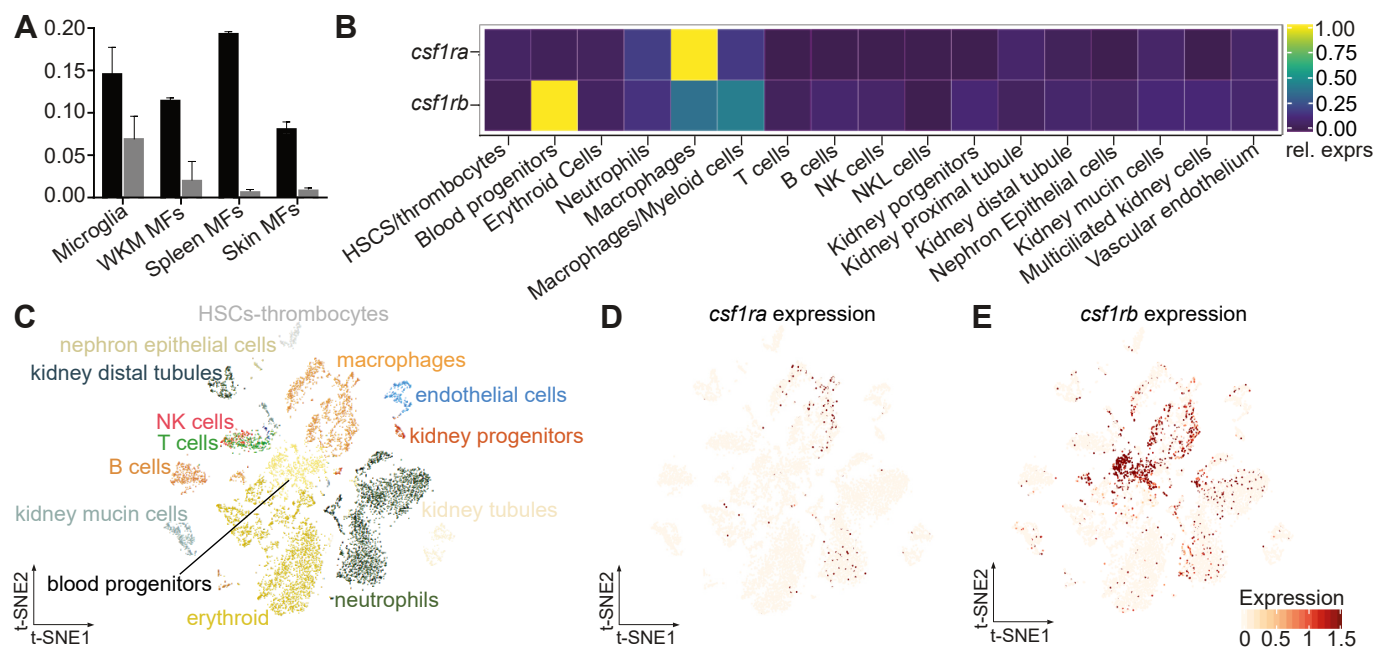

**Figure 2. Characterization of *csf1r* paralog expression in adult hematopoietic cells.** (A) QPCR expression for *csf1ra* and *csf1rb* in *cd45:DsRed<sup>+</sup>; mhc2dab:GFP<sup>+</sup>* mononuclear phagocytes sorted from adult zebrafish organs. Values on the y-axis indicate transcript expression normalized to *ef1a* expression level. Error bars represent SEM (n=3). WKM: whole kidney marrow, MF: macrophages. (B-E) Expression profiles of *csf1r* paralogs in adult WKM hematopoietic and non-hematopoietic populations by single-cell RNAseq analysis, extracted from the public database from Laureau et al, 2017. Heatmap (B), 2D projection of the t-SNE analysis showing the distinct clusters identified in the adult WKM (C) and profiles of *csf1ra* (D) and *csf1rb* (E) across the clusters of the tSNE plot. Intensity of the color is proportional to the expression level.

Figure 3

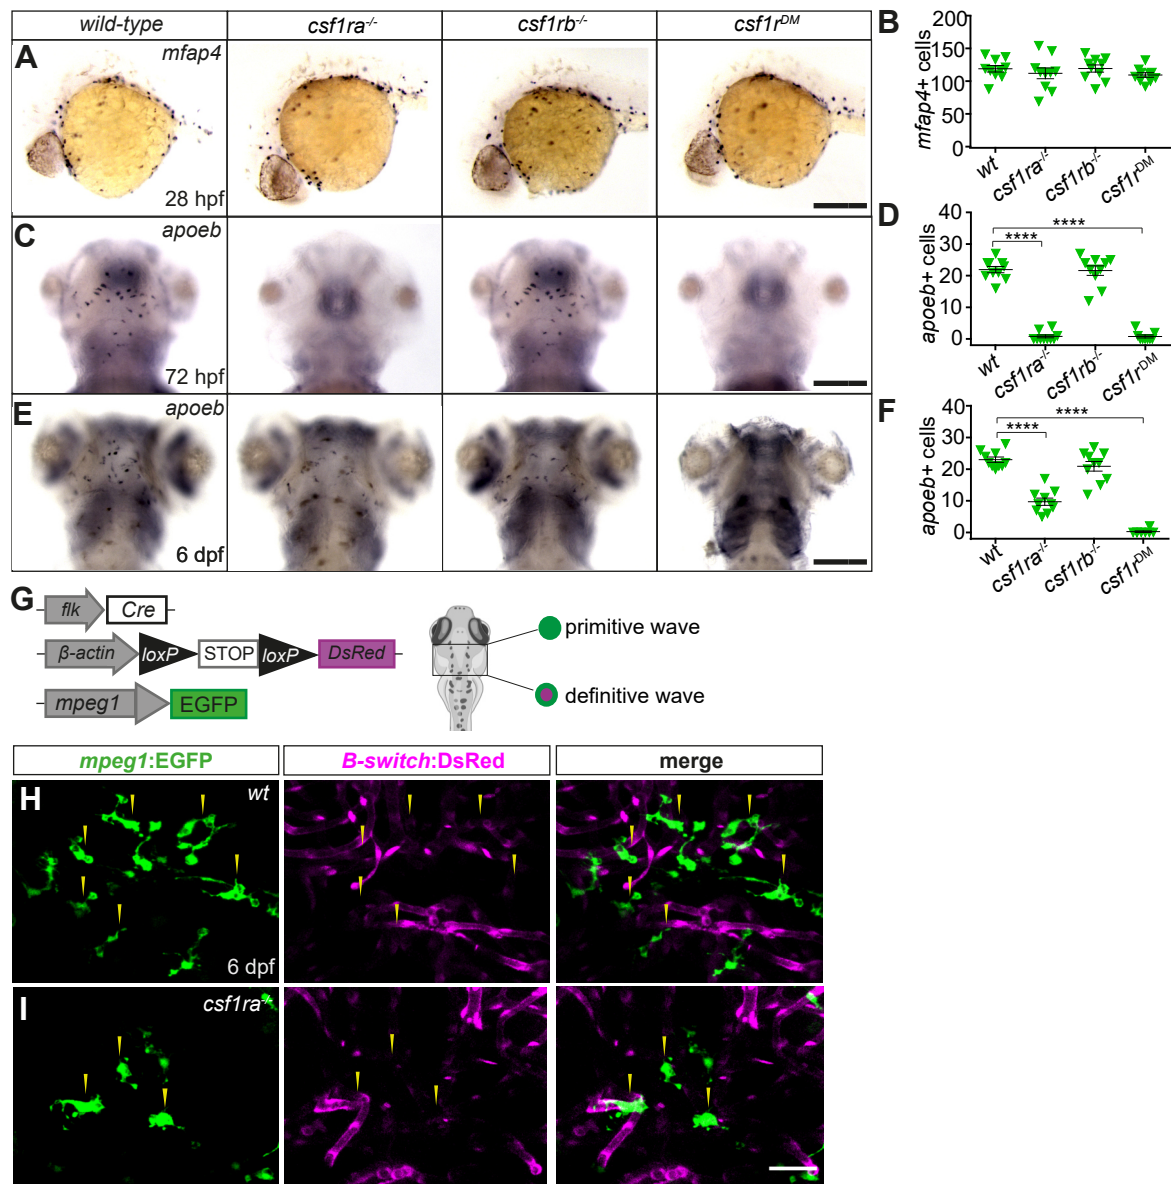

**Figure 3. *csf1ra* and *csf1rb* are differently required for embryonic microglia development.**

(A, C, E) WISH of the indicated genes in *wild-type*, *csf1ra<sup>-/-</sup>*, *csf1rb<sup>-/-</sup>* and *csf1r<sup>DM</sup>* siblings, at the stages indicated. All dorsal views except for A, shown in lateral view. Scale bars: 150  $\mu$ m (A, C); 100  $\mu$ m (E). (B, D, F) Quantification of *mfap4<sup>+</sup>* primitive macrophages (B), *apoeb<sup>+</sup>* microglia at 3 dpf (D) and at 6 dpf (F) in the indicated genotypes. Each symbol represents a single embryo/larvae and error bars represent mean  $\pm$  SEM. Differences between groups were analyzed by Students t-test [\*\*\* $p < 0.001$ ; \*\*\*\* $p < 0.0001$ ]. (G) Scheme of the transgenic lines used to discriminate the primitive and definitive microglia waves in 6 dpf larvae. (H, I) Imaging by confocal microscopy of the optic tectum in 6 dpf wild-type (H) and *csf1ra<sup>-/-</sup>* (I) sibling larvae carrying the *kdr1:Cre*;  *$\beta$ actin:Switch-DsRed*; *mpeg1:EGFP* triple transgene. GFP (left panels), DsRed (middle panels) and merge of both fluorescence channels (right panels) are shown. Images were taken with an inverted Zeiss LM780 confocal microscope using a 25x water-immersion objective. Scale bar: 50  $\mu$ m.

Figure 4

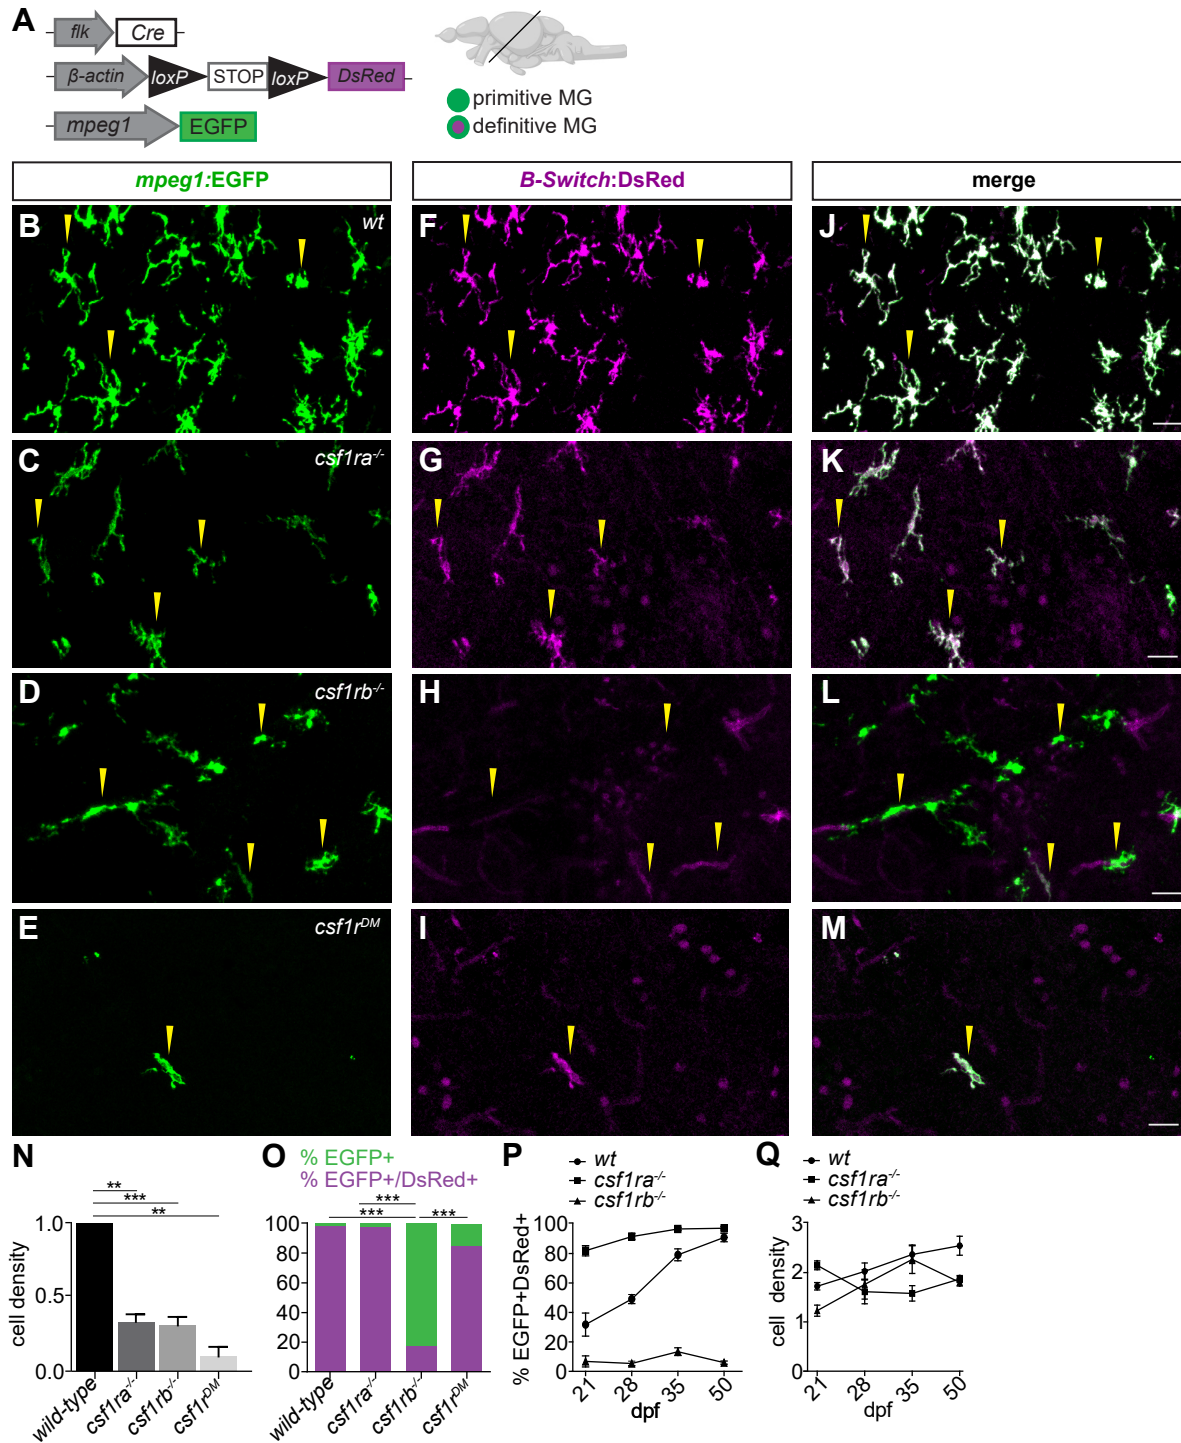

**Figure 4. *csf1rb* is required for HSCs-derived microglia development.** (A) Scheme of the transgenic lines used to discriminate primitive from definitive microglia in adult zebrafish brains. (B-M) Immunofluorescence on transversal brain sections from Tg(*kdr1:Cre*; *βactin:Switch-DsRed*; *mpeg1:EGFP*) triple transgenic adult *wild-type* (B, F, J), *csf1ra<sup>-/-</sup>* (C, G, K), *csf1rb<sup>-/-</sup>* (D, H, L) and *csf1r<sup>DM</sup>* (E, I, M) fish. GFP (left panels), DsRed (middle panels) and merge of both fluorescence channels (right panels) are shown. (N,O) Quantification of microglia density (GFP<sup>+</sup> cells/100 μm<sup>2</sup>) (N) and percentage of GFP<sup>+</sup> DsRed<sup>-</sup> (green) embryonic versus GFP<sup>+</sup> DsRed<sup>+</sup> (purple) adult microglia (O) in each genotype. Bars represent the mean ± SEM (n=4). For each individual, cells were counted on ten, 30μm-thick brain sections from rostral to caudal. Differences between groups were analyzed by One-way ANOVA test [\*\*\*p<0.0005]. Images were taken with an inverted Zeiss LM780 confocal using a 20x objective. Scale bars= 50μm. (P,Q) Percentage of GFP<sup>+</sup> DsRed<sup>+</sup> adult microglia (P) and microglia density (cells/1 mm<sup>3</sup>) (Q) at 21, 28, 35 and 50 dpf for each genotype. Cells were counted on tissue-cleared whole brains as described in Ferrero *et al*, 2018. Cell counts were limited to the optic tectum and hindbrain areas. Between 4 (21 dpf, 28 dpf) and 6 (50 dpf) images per brain were acquired, with an average z-stack of 400 μm., using a Zeiss LM780 confocal with a 25x water-immersion objective.

Figure 5

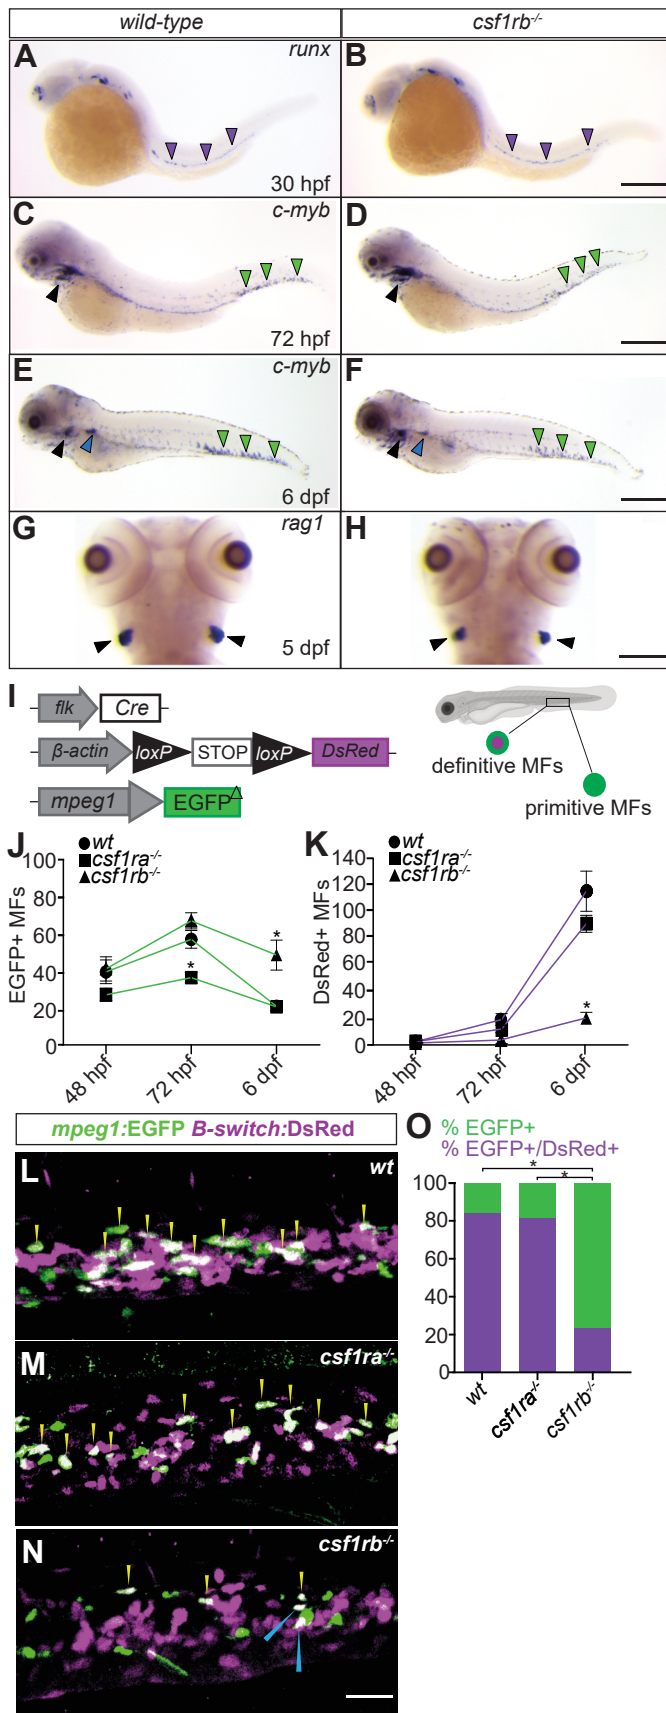

**Figure 5. Loss of *csf1rb* function impairs the development of definitive macrophages.** (A,H) WISH of the indicated genes in *wild-type* and *csf1rb*<sup>-/-</sup> siblings at the stages indicated. All lateral views except for G and H, shown in dorsal. The purple arrowheads indicate *runx1*<sup>+</sup> HSCs along the dorsal aorta. The green and blue arrowheads show *cmyb*<sup>+</sup> hematopoietic progenitors in the CHT and in the pronephros, respectively. Black arrowheads indicate *rag1*<sup>+</sup> or *cmyb*<sup>+</sup> lymphoid progenitors in the thymus. Scale bar: 200  $\mu$ m (A, B), 150  $\mu$ m (C, D, G, H), 100  $\mu$ m (E, F). (I-O) Confocal imaging analysis of definitive myelopoiesis in *csf1r* mutant embryos and larvae (I) Scheme of the transgenic lines used to discriminate the primitive and definitive myelopoiesis waves in the CHT. (J,K) Quantification of GFP<sup>+</sup> DsRed<sup>-</sup> primitive (J) and GFP<sup>+</sup> DsRed<sup>+</sup> definitive macrophages (K) in *wild-type*, *csf1ra*<sup>-/-</sup> and *csf1rb*<sup>-/-</sup> carrying the *kdr1:Cre*;  *$\beta$ actin:Switch-DsRed*; *mpeg1:EGFP* triple transgene, at the indicated developmental stages (n=4; symbols represent mean  $\pm$  SEM). (L-N) Confocal imaging and quantification of the percentage (O) of GFP<sup>+</sup> DsRed<sup>-</sup> primitive macrophages (green) versus GFP<sup>+</sup> DsRed<sup>+</sup> definitive macrophages (purple) in the CHT of 6 dpf *wild-type* and *csf1r* mutant larvae. Bars in the graph represent the mean of 4 larvae for each group. Cells in the CHT were quantified in four contiguous 385  $\mu$ m<sup>2</sup> fields per CHT, with an average 100  $\mu$ m z-stack, from caudal to rostral. Images were taken with an inverted Zeiss LM780 confocal microscope, using a 25x water-immersion objective. Difference between groups were analyzed by Kruskal-Wallis test [\*P<0.05].

Figure 6

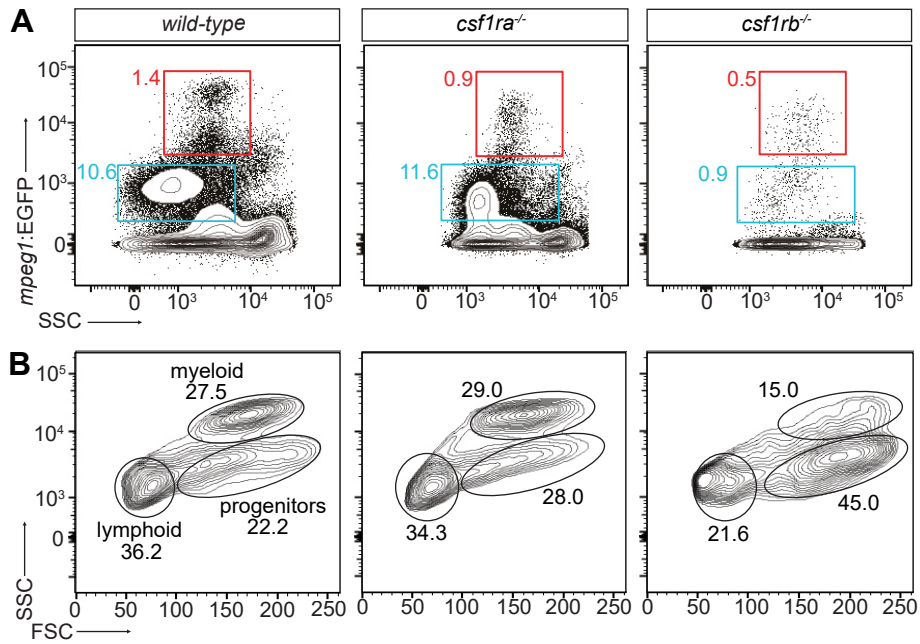

**Figure 6. Adult zebrafish *csf1rb* mutant display hematopoietic deficiencies.** (A, B) Flow cytometry analysis of WKM cell suspensions from *wild-type*, *csf1ra*<sup>-/-</sup> and *csf1rb*<sup>-/-</sup> adult fish carrying the *mpeg1:EGFP* reporter. (A) The *mpeg1:EGFP*<sup>hi</sup> fractions identify mature macrophages (red frames), while the *mpeg1:EGFP*<sup>lo</sup> fractions contain mainly IgM-expressing B lymphocytes (blue frames). (B) Scatter profiles of WKM in typical *wild-type* (left panel), *csf1ra*<sup>-/-</sup> (middle panel) and *csf1rb*<sup>-/-</sup> (right panel) adult fish. Number in plots indicate percent of cells in circled myeloid, progenitor and lymphoid gates. Means  $\pm$  SEM for 3 individuals are indicated in the text.



**Table 1. qPCR primers used throughout the paper**

| <b>Gene</b>                   | <b>Forward Primer</b> | <b>Reverse Primer</b> |
|-------------------------------|-----------------------|-----------------------|
| <i>ef1<math>\alpha</math></i> | GAGAAGTTCGAGAAGGAAGC  | CGTAGTATTTGCTGGTCTCG  |
| <i>mpeg1.1</i>                | CCCACCAAGTGAAAGAGG    | GTGTTTGATTGTTTTCAATGG |
| <i>csf1ra</i>                 | ATGACCATACCCAACCTTCC  | AGTTTGTTGGTCTGGATGTG  |
| <i>csf1rb</i>                 | TCGGTCTTGCTAGAGACATC  | ATGACCAGACATCACTTTGG  |

## Figure S1

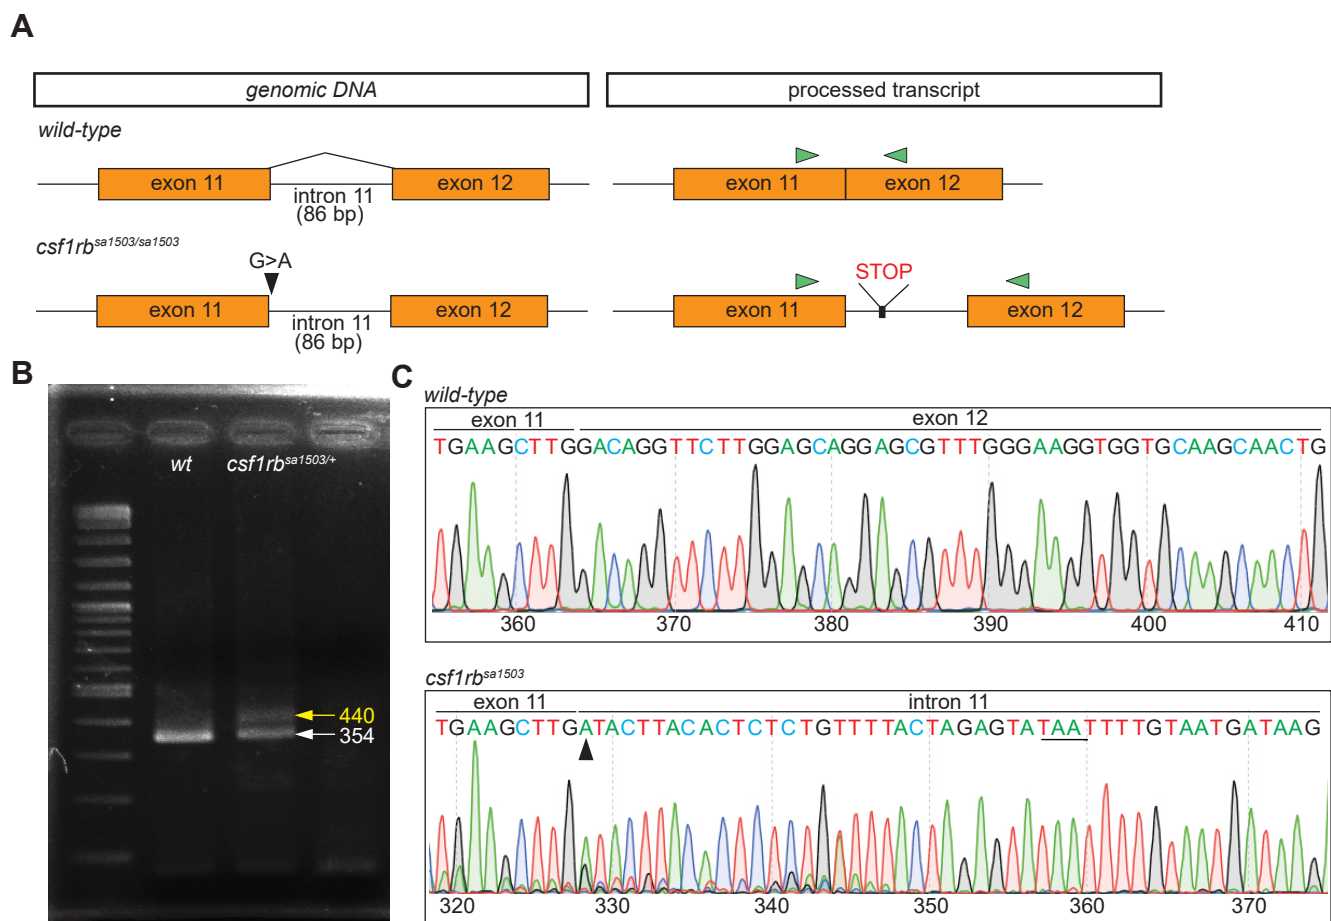

## Figure S2

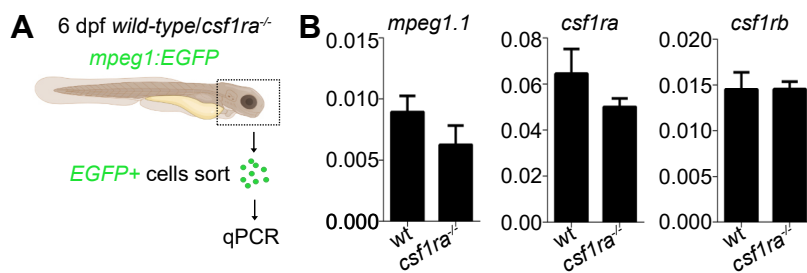

**Figure S2. Comparison of *csf1rb* expression in 6 dpf *wild-type* and *csf1ra<sup>-/-</sup>* head macrophages.** (A) Experimental outline. (B) qPCR analysis of gene expression for *mpeg1.1*, *csf1ra* and *csf1rb* in sorted *mpeg1:EGFP<sup>+</sup>* cells. Error bars represent SEM (n=3). Values on the y-axis indicate transcript expression normalized to *ef1a* expression level.
